1           **Comparative genomic analysis of skin and soft tissue *Streptococcus***  
2                   ***pyogenes* isolates from low- and high-income settings**  
3

4 Saikou Y. Bah<sup>1,3#</sup>, Alexander J. Keeley<sup>2</sup>, Edwin P. Armitage<sup>3</sup>, Henna Khalid<sup>1</sup>, Roy R.  
5 Chaudhuri<sup>1</sup> Elina Senghore<sup>3</sup>, Jarra Manneh<sup>3</sup>, Lisa Tilley<sup>4</sup>, Michael Marks<sup>5,6</sup>, Saffiatou Darboe<sup>3</sup>,  
6 Abdul K. Sesay<sup>3</sup>, Thushan I de Silva<sup>2,3</sup> & Claire E. Turner<sup>1#</sup>, and on behalf of The MRCG  
7 StrepA Study Group  
8

- 9           1. Department of Molecular Biology & Biotechnology, The Florey Institute, University  
10           of Sheffield, Sheffield, United Kingdom.  
11           2. Department of Infection, Immunity & Cardiovascular Disease, The Florey Institute,  
12           University of Sheffield Medical school, Sheffield, United Kingdom.  
13           3. The Medical Research Council, The Gambia at the London School of Hygiene and  
14           Tropical Medicine, The Gambia.  
15           4. Department of Microbiology, Sheffield Teaching Hospitals NHS Foundation Trust,  
16           Sheffield, United Kingdom  
17           5. Clinical Research Department, Faculty of Infectious and Tropical Diseases, London  
18           School of Hygiene & Tropical Medicine, London, United Kingdom  
19           6. Hospital for Tropical Diseases, London, United Kingdom  
20

21 **#Joint Corresponding authors:**

22 Dr Saikou Bah

23 saikouybah@gmail.com

24 Dr Claire Turner

25 c.e.turner@sheffield.ac.uk

26 **Abstract**

27 *Streptococcus pyogenes* is a leading cause of human morbidity and mortality, especially in  
28 resource limited settings. The World Health Organisation has recently made a vaccine for *S.*  
29 *pyogenes* a global health priority to reduce the burden of the post-infection rheumatic heart  
30 disease. For a vaccine to be active against all relevant strains in each region, molecular  
31 characterisation of circulating *S. pyogenes* isolates is needed. We performed extensive  
32 comparative whole genome analyses of *S. pyogenes* isolates from skin and soft tissue infections  
33 in The Gambia, West Africa, where there is a high burden of such infections. To act as a  
34 comparator to this low-income country (LIC) collection of isolates, we performed genome  
35 sequencing of isolates from skin infections in Sheffield, UK, as representative high-income  
36 country (HIC) isolates. LIC isolates from The Gambia were genetically more diverse (46 *emm*-  
37 types in 107 isolates) compared to HIC isolates from Sheffield (23 *emm*-types in 142 isolates),  
38 with only 7 overlapping *emm*-types and with diverse genetic backgrounds. Characterisation of  
39 other molecular markers indicated some shared features, including a high prevalence of the  
40 skin infection-associated *emm*-pattern D and the variable fibronectin-collagen-T antigen (FCT)  
41 types FCT-3 and FCT-4. A previously unidentified FCT (FCT-10) was identified in the LIC  
42 isolates, belonging to two different *emm*-types. A high proportion (79/107; 73.8%) of LIC  
43 isolates carried genes for tetracycline resistance, compared to 53/142 (37.3%) HIC isolates.  
44 There was also evidence of different circulating prophages, as very few prophage-associated  
45 DNases and lower numbers of superantigens were detected in LIC isolates. Our study provides  
46 much needed insight into the genetics of circulating isolates in a LIC (The Gambia), and how  
47 they differ from those circulating in HICs (Sheffield, UK). Common molecular features may  
48 act as bacterial drivers for specific infection types, regardless of the diverse genetic  
49 background.

## 50 **Introduction**

51 *Streptococcus pyogenes* (Group A *Streptococcus*, GAS) is a human-specific pathogen and a  
52 leading cause of morbidity and mortality, especially in resource-limited countries. *S. pyogenes*  
53 can cause diseases ranging from mild superficial infections, such as impetigo and pharyngitis,  
54 to invasive diseases such necrotising fasciitis and streptococcal toxic shock syndrome (1) and  
55 can also cause post-infection autoimmune sequelae such as acute rheumatic fever (ARF)  
56 leading to rheumatic heart disease (RHD). There is a substantial global burden of RHD,  
57 accounting for approximately 320,000 deaths in 2015, the majority of which were recorded in  
58 sub-Saharan Africa (2). Recognising this burden, the World Health Organisation (WHO) has  
59 prioritised the need for a vaccine that would have global coverage, and recommended an  
60 increase in research, especially in low- to middle-income countries (LMICs) (3).

61 Progress towards a vaccine for *S. pyogenes* has been hampered over the years by the association  
62 of the most promising vaccine candidate, the surface protein M, with the development of RHD.  
63 This may be circumvented by targeting the N terminal portion of the M protein, but this region  
64 is hypervariable, thus any vaccine would be serotype/genotype specific. *S. pyogenes* isolates  
65 are genotyped by sequencing the corresponding hypervariable 5' region of the M protein-  
66 encoding gene, *emm*. Over 220 different *emm*-types have been identified globally, but in high  
67 income countries (HICs) the majority of disease is caused by a limited number of *emm*-types,  
68 with *emm1* being the most common. A 30-valent M-protein vaccine has been developed and is  
69 undergoing clinical trials but is based on genotypes predominantly circulating in Europe and  
70 North America (4, 5). The limited available data for *S. pyogenes* in LMICs suggest a far more  
71 genetically diverse population than that seen in HICs (6–9). More extensive, global genomic  
72 analysis may reveal another vaccine target or combination of targets that would be applicable  
73 in these settings.

74 The *emm* gene lies within the *S. pyogenes* core *mga* (multi gene activator) regulon locus, and  
75 upstream and/or downstream of the *emm* gene there may be additional *emm*-like genes. There  
76 have been ten different *emm* patterns identified, based on the genes within the *mga* regulon,  
77 which form three main groupings: A-C, D or E. The majority of *emm* types have been  
78 associated with only one *emm* pattern (10). There is some epidemiological evidence supporting  
79 the existence of tissue tropism among *emm* types, with preference for either pharyngeal or skin  
80 infection sites, or “generalists” that are equally able to infect both sites (11). There is also an  
81 association with this tissue tropism to *emm* pattern; pharyngeal specialists are pattern A-C, the  
82 skin specialists are pattern D, and the generalists are pattern E (10). However, much of this  
83 evidence comes from population-based surveys where there is greater sampling of pharyngeal  
84 infections in HICs but more skin infections (impetigo/pyoderma) in LMICs (12). Whether this  
85 reflects an actual difference in the prevalence of infection types is unclear, as data is lacking  
86 for both skin infections in HICs and pharyngeal infections in LMICs (12-14).

87 It is estimated that more than 162 million children have impetigo/pyoderma at any given time,  
88 predominantly in LMICs, although data for Europe, South-East Asia and North America is  
89 very limited (14). A recent study in The Gambia, West Africa, identified a 17.4% prevalence  
90 of pyoderma in children, with *S. pyogenes* as a leading infection cause (15). This was higher  
91 than the estimated global prevalence of 12.3% (14). The association with scabies infestation in  
92 The Gambia was lower than that seen in other settings, but there was an increase in pyoderma  
93 prevalence from 8.9% to 23.1% during the rainy season (15). Whilst there may be  
94 environmental and socio-demographic factors underpinning the high burden of pyoderma in  
95 The Gambia, there may also be bacterial factors involved and potentially tissue tropism. To  
96 investigate this, and to provide molecular characterisation of *S. pyogenes* causing skin  
97 infections in The Gambia, we performed whole genome sequencing on the isolates obtained  
98 from our previous study (15). To act as a comparative HIC collection of isolates, we also

99 performed whole genome sequencing and molecular characterisation of *S. pyogenes* isolated  
100 from skin infections in Sheffield, UK. Our study highlights the genetic diversity observed in  
101 an LMIC *S. pyogenes* population compared to a HIC population with limited overlap of *emm*-  
102 types. However, there were some shared molecular markers associated with skin infection  
103 isolates, including *emm*-pattern, *emm*-cluster and FCT-type, supporting the hypothesis that  
104 there are bacterial factors driving certain types of infection.

## 105 **Material and Methods**

### 106 **Isolates**

107 *S. pyogenes* skin pyoderma lesion isolates from one hundred and thirty-six children under the  
108 age of 5 in the peri-urban setting of Sukuta in The Gambia, collected between May and  
109 September 2018 (15), were available for whole genome sequencing. As previously described,  
110 swabs were stored in liquid Amies transport medium before being taken to Medical Research  
111 Council Unit The Gambia at London School of Hygiene & Tropical Medicine (MRCG at  
112 LSHTM) for culture and identification of *S. pyogenes* (15). To provide a representative  
113 collection of *S. pyogenes* from a HIC for comparison, 160 sequentially cultured skin and soft  
114 tissue infection (SSTI) isolates were collected from the Department of Laboratory Medicine,  
115 Northern General Hospital, Sheffield, UK between January and April 2019. No patient data  
116 were obtained for these isolates so no selection was applied for patient characteristics such as  
117 age or sex.

### 118 **Whole genome sequencing**

119 Streptococcal DNA was extracted from isolates using a method previously described (16). For  
120 Gambian isolate DNA, sequencing libraries were prepared using the NEBNext Ultra<sup>TM</sup> II DNA  
121 Library Prep Kit for Illumina and sequenced on an Illumina MiSeq at MRCG. The MiSeq V3  
122 reagent kit was used to generate 250bp paired end reads following the Illumina recommended

123 denaturation and loading recommendations which included a 5% PhiX spike-in. Raw sequence  
124 quality assessment was performed using FastQC (v0.11.8;  
125 <https://www.bioinformatics.babraham.ac.uk/projects/fastqc>) with default settings and reads  
126 were trimmed using Trimmomatic (v0.38) with following settings: LEADING:3 TRAILING:3  
127 SLIDINGWINDOW:4:15 MINLEN:36 (17). Sequencing of the genomic DNA from Sheffield,  
128 UK collection isolates and a selection of isolates from the Gambia collection that were  
129 subjected to repeat sequencing after failing quality control, was provided by MicrobesNG  
130 ([microbesng.com](http://microbesng.com)) using the Nextera XT Library Prep kit (Illumina) and the Illumina  
131 HiSeq/NovaSeq platform generating 250bp pair end reads. Data was subjected to MicrobesNG  
132 quality control and Trimmomatic pipelines. Short read sequence data were submitted to the  
133 sequence read archive and accession numbers are provided in Supplementary Table 1.

#### 134 **Whole genome sequence analysis**

135 *De novo* assembly was performed using SPAdes (v3.13.1) with k-mers sizes of 21, 33, 55 and  
136 77 (18). Assembly qualities statistics were generated using Quast (19) (Supplementary Table  
137 1) and any assemblies with more than 500 contigs and a total genome size greater than 2.2Mb  
138 were removed from downstream analyses. Prokka (v1.13.3) was then used to annotate the  
139 assemblies (20) and the pangenome determined using Roary (v3.12.0) with a 95% identity level  
140 (21). Single nucleotide polymorphism (SNP) distances were determined from the Roary core-  
141 gene alignment output using snp-dists (v0.7.0, <https://github.com/tseemann/snp-dists>).  
142 RAxML (v8.2.12) (22) was used to generate maximum likelihood phylogenetic trees based on  
143 the core-gene alignment, with GTR substitution model and 100 bootstraps. Phylogenetic trees  
144 were visualized and annotated using iTOL (23). The *emm* types were determined from the *de*  
145 *novo* assemblies using `emm typer.pl`  
146 ([github.com/BenJamesMetcalf/GAS\\_Scripts\\_Reference](https://github.com/BenJamesMetcalf/GAS_Scripts_Reference)). Where necessary, *emm* genes were  
147 manually located and type determined using the CDC *emm*-typing database

148 (www.cdc.gov/streplab). New *emm*-subtypes were submitted to the database for assignment.  
149 Multi-locus sequence types (MLSTs) were determined using the MLST database  
150 (pubmlst.org/spyogenes) and a script from the Sanger pathogen genomics group  
151 (github.com/sanger-pathogens/mlst\_check). Any new alleles and sequence types were  
152 submitted to the PubMLST database.

### 153 **Variable factor typing**

154 The presence of superantigens; *speA*, *speC*, *speG*, *speH*, *speI*, *speJ*, *speK*, *speL*, *speM*, *speQ*,  
155 *speR*, *ssa* and *smeZ*, and DNases; *sda1*, *sda2*, *sdn*, *spd1*, *spd3* and *spd4* were initially  
156 determined by BLAST of representative gene sequences against the *de novo* assemblies. Gene  
157 presence was then additionally confirmed by BWA-MEM (24) mapping of the short read  
158 sequences to a pseudo sequence of concatenated superantigen and DNase genes; coverage of  
159 at least 10 reads across the whole gene was used to confirm presence. Where the BLAST and  
160 mapping did not agree, results were manually inspected in the annotated *de novo* assemblies.  
161 Antimicrobial resistance (AMR) gene carriage was determined with ABRicate v0.8.13  
162 (github.com/tseemann/abricate) using the ARG-ANNOT database (25), setting a minimum  
163 coverage of 70% and percentage identity of 75%.

164 The nucleotide sequences for *covR*, *covS* and *rocA* regulatory genes and the *hasA*, *hasB* and  
165 *hasC* capsule biosynthesis genes from the *S. pyogenes* H293 reference genome (*emm89*,  
166 NZ\_HG316453.1) were used as queries in blastn searches against the *de novo* assemblies. The  
167 start and end coordinates of the best BLAST hits were converted into BED files and used to  
168 extract the nucleotide sequences from the *de novo* assemblies using BEDTools (v2.27.1) (26).  
169 Extracted gene sequences were then translated into amino acids and variants determined in  
170 comparison to the corresponding amino acid sequences of the reference (H293) protein

171 sequences. For *hasABC*, only nonsense variants and gene absence were recorded  
172 (Supplementary Table 1).

### 173 ***Emm* pattern and FCT regions**

174 To determine the *emm* pattern in the genome of each isolate, *in silico* PCR  
175 ([https://github.com/simonrharris/in\\_silico\\_pcr](https://github.com/simonrharris/in_silico_pcr)) was used to extract the sequence of the whole  
176 *mga* regulon (the beginning of *mga* to the end of *scpA*) from *de novo* assemblies and then  
177 annotated with Prokka. To improve assemblies where the *mga* regulon was not within  
178 contiguous sequence, *de novo* assemblies were ordered against a completed reference genome  
179 of the same *emm*-type (where available) using ABACAS (27) and the *in silico* PCR repeated.  
180 An *emm* pattern of I, II, III, IV, V or VI was assigned using BLAST to identify genes followed  
181 by visual determination of gene location within the regulon. For 22 LIC and 3 HIC isolates,  
182 the *emm* pattern could not be determined as contiguous sequence for the *mga* regulon could  
183 not be obtained (detailed in Supplementary Table 1).

184 Alleles of the *emm*-like genes *enn* and *mrp* were assigned by comparison to those identified by  
185 Frost *et al.* (28), ensuring 100% nucleotide identity across the entire gene sequence. Where we  
186 could not obtain contiguous sequence for the *mga* regulon, *enn* and *mrp* alleles were  
187 determined by BLAST of each allele sequence against the entire *de novo* assembly. New alleles  
188 for *enn* and *mrp* were kindly assigned by Prof Pierre Smeesters and Dr Anne Botteaux. In some  
189 cases, breaks in the *de novo* assemblies occurred within the *enn* gene and therefore alleles could  
190 not be confirmed (detailed in Supplementary Table 1).

191 To determine the arrangement of the genes in the FCT region and the FCT type, *in silico* PCR  
192 was used to extract the FCT region and annotated with Prokka. Assemblies in which amplicons  
193 were not obtained due to contig break in the FCT regions, were again ordered against a close  
194 reference of the same *emm*-type (where available). The ORFs within each extracted FCT region



195 were blasted against the entire NCBI database and, in combination with order of the genes, the  
196 FCT types were assigned based on previously assigned FCT type where possible (29). For  
197 some isolates, it was not possible to obtain contiguous sequence for the FCT region and so the  
198 FCT type was estimated based on manual inspection of the *de novo* assembly and identification  
199 of FCT associated genes through BLAST.

## 200 **Results**

### 201 **Genetic diversity of *S. pyogenes* LIC and HIC skin and soft tissue isolates**

202 We performed whole genome sequencing on 115 of 127 *S. pyogenes* skin infection isolates  
203 collected in The Gambia (15). After quality control and filtering of reads and *de novo*  
204 assemblies, we obtained high quality genome sequence data for a total of 107 Gambian (LIC)  
205 *S. pyogenes* isolates for further analyses (Supplementary Table 1). Within the genomes of these  
206 107 isolates, we determined 46 different *emm*-types, with no obvious dominant *emm*-type; the  
207 most common being *emm80* (6/107, ~6%), closely followed by *emm85*, *emm229* and  
208 *emm/stG1750* (5/107 isolates, ~5% each). Although *emm/stG1750* has been previously  
209 identified in group G streptococci, in this case these isolates were *S. pyogenes* with the group  
210 A carbohydrate. The multi-locus sequence types (STs) for all 107 isolates were determined and  
211 revealed 57 different types, of which 25 were assigned for the first time. Although multiple  
212 STs could be found within single *emm*-types, no STs were shared by multiple *emm*-types.

213 An *emm*-pattern could be assigned to the majority of isolates using the previously determined  
214 classifications. The exceptions were two *emm147* isolates, one *emm162* isolate, one *emm247*  
215 isolate and five *emm/stG1750* isolates, for which an *emm* pattern had not been previously  
216 described. For the 98 isolates with known *emm*-patterns, 48% (n=47) were D, 40% were E  
217 (n=39) and 12% (n=12) were A-C (Figure 1 and Figure 2). In addition to *emm*-pattern, an *emm*-  
218 cluster type could also be assigned to these 98 isolates. The *emm*-cluster type is based on the

219 sequence of the full M protein and is broadly associated with *emm*-pattern (30). The majority  
220 of isolates (56/98, ~57%,) were assigned to one of the six E *emm*-cluster types: E1 (n=4), E2  
221 (n=2), E3 (n=14), E4 (n=16), E5 (n=2), E6 (n=18), representing 25 *emm*-types. All E1-E4 and  
222 all but four E6 *emm*-types were positive for the serum opacity factor (*sof*) gene, commonly  
223 associated with E *emm*-clusters (11), however E5 *emm*-types were *sof* negative. The remaining  
224 isolates were A-C4 (n=6), D1 (n=1), D2 (n=1), D4 (n=17) or singletons (n=17).

225 Phylogenetic analysis of the core genome of all 107 LIC isolates showed clustering by *emm*-  
226 type (Figure 1). The exceptions to this were *emm25*, *emm65*, *emm85*, *emm89* and *emm209*,  
227 whereby two distinct lineages were identified within these genotypes. Pairwise distance  
228 analysis identified a median of 22 SNPs when comparing isolates with the same *emm* type  
229 (range; 0-11,142 SNPs), and a median of 9,816 SNPs when comparing isolates with different  
230 *emm* types (range 1,423 to 12,428) (Supplementary Figure 1A).

231 After read quality filtering and assembly assessment, we obtained draft genomes from 142 *S.*  
232 *pyogenes* skin infection isolates collected in Sheffield, UK. Within these 142 HIC isolates  
233 there were 23 different *emm*-types but ~59% of the isolates were represented by just 5 *emm*-  
234 types: *emm108* (30/142, 21%), *emm89* (19/142, 13%), *emm12* (15/142, 11%), *emm1* (10/142,  
235 7%) and *emm4* (9/142, 6%). An *emm*-pattern could be assigned to all 142 isolates and 36%  
236 (n=51) were D, 35% (n=50) were E and 29% (n=41) were A-C (Figure 2 and Figure 3). An  
237 *emm*-cluster type was also assigned to all 142 isolates and the majority of isolates were D4  
238 (n=50, 35%). No other D cluster-types were found. The most common E cluster type was E4  
239 (n=26), followed by E6 (n=14), E1 (n=9) and E3 (n=2) (Figure 2). The A-C clusters were  
240 represented by *emm1* (A-C3, n=10), *emm12* (A-C4, n=15) and *emm3* (A-C5, n=5), which were  
241 absent *emm*-types in the LIC population (Figure 2). Only *emm5* (n=4) and *emm6* (n=7) were  
242 singleton *emm*-cluster types.

243 Consistent with the fewer *emm*-type within the HIC isolate collection, we identified only 28  
244 different STs, the most common being ST14, ST101, ST36 and ST28, reflective of their  
245 association with the dominant genotypes *emm*108, *emm*89, *emm*12 and *emm*1, respectively.  
246 As with the LIC isolates, STs were unique to a single *emm*-type.

247 The phylogenetic analysis of the HIC isolates based on core-genome SNPs also grouped  
248 isolates into lineages based on *emm*-types, and all *emm*-types formed single lineages (Figure  
249 3). Pairwise genetic distance between isolates identified a median of 17 SNPs between isolates  
250 of the same *emm* type (range 0 to 2206), compared to a median of 11100 SNPs distance  
251 between isolates belonging to different *emm* types (range 3057 to 12339) (Supplementary  
252 Figure 1B).

253 Surprisingly, only seven out of the 62 total *emm*-types identified were common to both LIC  
254 and HIC isolates: *emm*4, 28, 75, 77, 80, 81 and 89. However, except for *emm*80 (*emm*80.0),  
255 the other six overlapping *emm*-types were of different *emm* sub-types between the two sites  
256 (Figure 2, Supplementary table 1). All were *emm*-cluster E *emm*-types, except *emm*80 which  
257 belongs to *emm*-cluster D4. Pairwise comparison of isolates from the two different sites within  
258 each of these *emm*-types revealed a level of genetic distance similar to that observed when  
259 isolates of different *emm*-types were compared, indicating that, although they may share an  
260 *emm*-type, they do not share a core genome.

261 It is also possible that closely related isolates may exist within both collections but carry  
262 different *emm* genes. Core-gene phylogeny of all isolates from both sites combined showed  
263 clear segregation of isolates from different sites, except in one instance where an *emm*192 HIC  
264 isolate clustered with two *emm*56 LIC isolates (Supplementary Figure 2).

265 The core genome of isolates from both sites combined was 1191 genes from a total of 7921  
266 genes. However, while 1416 genes were present in at least one HIC isolate and absent from all

267 LIC isolates, 3418 genes were present in at least one LIC isolate but absent from all HIC  
268 isolates. This indicates a greater accessory genome in LIC isolates. The core genome of LIC  
269 isolates alone was 1288, similar to HIC isolates at 1242, but there was a total of 6408 genes in  
270 LIC isolates compared to 4411 genes in HIC isolates.

### 271 **The Mga-regulon diversity**

272 The core Mga-regulon includes the *mga* gene and all intervening genes up to and including  
273 *scpA* (encoding for the C5a peptidase). Genes within this region encode proteins involved in  
274 cell invasion and immune evasion and include those for the M protein, encoded by *emm*, and  
275 the M-like proteins Mrp and Enn. The composition of the intervening genes that define the  
276 Mga-regulon, as well as the type of M protein and positivity for serum opacity factor (*sof*),  
277 relates to the *emm* pattern (A-C, D or E) (10,28). We were able to determine the composition  
278 of the Mga-regulon for 36/46 *emm*-types for 85/107 LIC isolates and all 23/23 *emm*-types for  
279 139/142 HIC isolates. Among the LIC isolates, we could not confirm the Mga-regulon for all  
280 isolates within ten different *emm* types, because it was not contiguous in the *de novo*  
281 assemblies, possibly due to sequence quality or repetitive regions. For the HIC isolates, this  
282 was the case for only single isolates within *emm* types *emm1*, 12 and 108, and other isolates  
283 within these *emm*-types had confirmed Mga-regulons.

284 Six different Mga-regulon compositions were identified across isolates from both sites (Figure  
285 4) but the vast majority of *emm*-types from both sites were Mga-regulon type I, consisting of  
286 *mga*, *mrp*, *emm*, *enn* and *scpA*. This type was found in 31/36 *emm*-types in LIC isolates and  
287 16/23 *emm*-types in HIC isolates, accounting for 88% (75/85) and 71% (98/139) of the LIC  
288 isolates and HIC isolates, respectively. Mga-regulon type II, with the *emm1* streptococcal  
289 inhibitor of complement (*sic*) or *emm12* SIC related gene (*drc*), was only found in HIC isolates.

290 Alleles for *mrp* and *enn* were extracted and compared for associations with *emm* and  
291 geographical location of the isolate. Ninety-seven *mrp* genes and 92 *enn* genes were extracted  
292 from the 107 LIC isolate genomes, resulting in 44 unique *mrp* sub-alleles and 48 unique *enn*  
293 sub-alleles. From the 142 HIC isolate genomes, we extracted 101 *mrp* genes and 99 *enn* genes,  
294 resulting in 22 unique *mrp* sub-alleles and 21 unique *enn* sub-alleles. For the majority, unique  
295 alleles were associated with *emm*-type and geographical location, although phylogenetic  
296 analysis did show overall there was limited geographical restriction between closely related  
297 alleles (Supplementary Figure 3). There were two main clades for both Mrp and Enn, each with  
298 one clade associated with E cluster *emm*-patterns while the other associated with a mix of *emm*-  
299 patterns. We did identify some instances of the same *mrp* allele associated with different *emm*  
300 types, although, with one exception, this was restricted to the LIC isolates. The *mrp202* allele  
301 was shared by *emm119* and *emm162* isolates and *mrp60* was shared by *emm85* and *emm89*  
302 isolates. Sub-alleles (same amino acid sequence but different nucleotide sequence) *mrp193.14*  
303 and *mrp193.15* were found in *emm116* and *emm86*, respectively. Different sub-alleles of  
304 *mrp195* were found in the LIC *emm18*, *emm95* and *emm/stg1750* isolates but also in HIC  
305 *emm53* isolates. A similar pattern was also found with *enn*, with different sub-alleles of *enn199*  
306 found in the LIC *emm65* and *emm182* isolates, and sub-alleles of *enn26* found in the LIC  
307 *emm168* but also HIC *emm89* isolates.

308 We also looked for the presence of the *fbaA* gene, downstream of *scpA* (outside of the Mga-  
309 regulon), which encodes a surface protein associated with the infection potential of pattern D  
310 skin isolates (11,31). This gene was found in all D pattern and E pattern isolates but was absent  
311 in 75% of A-C pattern HIC and LIC isolates (Supplementary Table 1).

## 312 **Diversity of superantigens and DNases in the skin isolates**

313 The complement of superantigen and DNase genes *S. pyogenes* isolates can vary, mainly due to the association of these factors with mobile bacteriophages. There are potentially 314 13 different superantigen genes that can be carried by *S. pyogenes*; *speA*, *speC*, *speH*, *speI*, 315 *speK*, *speL*, *speM*, and *ssa* are prophage-associated, while *speG*, *speJ*, *speQ*, *speR* and *smeZ* 316 are chromosomal. Of the 107 LIC isolates, 99 (93%) carried *speG* and 97 (91%) had *smeZ*. 317 Less common were *speJ* and the co-transcribed *speQ/speR*, found in 43/107 (40%) and 7/107 318 (7%), isolates respectively (Figure 5). A similar pattern was observed in the HIC isolates, with 319 130/142 (92%) and 134/142 (94%) isolates carrying *speG* and *smeZ* respectively, while *speJ* 320 was present in 46/142 (32%) and *speQ/speR* was carried in 9/142 (6%) isolates. 321

322 Of the prophage-associated superantigens, *speC* was the most predominant in the LIC isolates, 323 carried by 26/107 (24%) isolates (Figure 5), and in the HIC isolates, although much higher at 324 55% (78/142). Two (out of eight) *emm43* HIC isolates and the single *emm102* HIC isolate each 325 carried two copies of *speC*, as well as two copies of the associated DNase *spdI*. These appeared 326 to be carried on two separate phages integrated at two different sites.

327 In the HIC isolates, prophage-associated *ssa* was present in 63/142 (44%) isolates, compared 328 to only 8/107 (7%) of the LIC isolates.

329 Interestingly, *speA* was almost equally common in the LIC isolates (22/107, 21%) as in the 330 HIC isolates (28/142, 20%), but, apart from one *emm89* isolate, all LIC isolates carried the 331 *speA4* allele (or a *speA* very close to this allele) which is 11% divergent from the other alleles 332 (32) and was associated with a prophage-like element rather than a full prophage. This 333 prophage-like element has been previously identified in the *emm6* reference strain 334 MGAS10394, termed  $\Phi$ 10394.2, and comprised of transposases and fragments of *speH* and 335 *speI* (Supplementary Figure 4) (32). Previously, it has only been found in *emm6*, *emm32*,

336 *emm67* and *emm77*. In the HIC isolate collection this element, and the *speA4* allele, was only  
337 found in *emm6*. The only isolate in the LIC isolate collection that carried a different *speA* allele,  
338 one synonymous base pair different to *speA.1*, was associated with a prophage, although this  
339 did not share any substantial identity to other known prophages in *S. pyogenes* (determined by  
340 BLASTn against the entire NCBI database).

341 Prophage-associated *speH*, *speI*, *speK*, *speL* and *speM* were detected at fairly similar levels  
342 between the two sites; 15%, 13%, 20%, 5%, and 7% respectively in LIC isolates compared to  
343 25%, 16%, 25%, 8% and 8% in the HIC isolates (Figure 5). One LIC *emm65* isolate had an  
344 apparent fusion gene comprised of 5' *speK* and 3' *speM*. An alignment of the 259 amino acids  
345 (aa) of this potential fusion protein showed 100% identity to the first 180 aa of SpeK and a  
346 100% of the remaining 181-259 aa to the last 159-237 aa of SpeM (Supplementary Figure 5).

347 We also tested for the presence of the prophage-associated DNases *sda*, *sdn*, *spd1*, *spd3* and  
348 *spd4* (33). Only two prophage-associated DNases were identified in the LIC isolates; *spd1*,  
349 26/107 (24.3%) and *spd3*, 2/107 (1%). These were also the most prevalent in the HIC isolates,  
350 at 79/142 (56%) and 99/142 (70%), respectively but we also detected *sda1*; 7/142(5%), *sda2*;  
351 23/147(16%), *sdn* 23/147(16%) and *spd4* 10/142(7%).

### 352 **Hyaluronic capsule biosynthesis genes**

353 Although the hyaluronic capsule is considered an important virulence factor, recently it was  
354 shown that genotypes *emm4*, *emm22* and *emm89* lack the *hasABC* operon required to  
355 synthesise the capsule. Additionally, in HICs there is a high proportion of isolates within  
356 different genotypes whereby *hasA* or *hasB* has either been deleted or carries a mutation that  
357 would render the encoded protein non-functional, predicted to result in the lack or reduction of  
358 capsule (33). The *hasABC* operon was detected in all the LIC isolates, including the *emm4* and  
359 *emm89* isolates, supporting the findings that they have a different core genome compared to



360 HIC *emm4* and *emm89*, which all lacked the *hasABC* operon. No variations were detected in  
361 the *hasA* and *hasB* genes that would lead to truncated proteins in the LIC isolates, except for  
362 one *emm74* isolate with a *hasA* variant that would encode for a truncated HasA. In the HIC  
363 isolates and consistent with previous findings (33), all *emm28*, *emm77* and *emm87* isolates  
364 were predicted to produce truncated HasA, and all *emm81* and *emm94* predicted to produce  
365 truncated HasB. Three other isolates were predicted to produce truncated HasA and a further  
366 two to produce truncated HasB, but these were sporadic examples within *emm*-types  
367 (Supplementary Table 1).

### 368 **FCT-types in the LIC and HIC isolates**

369 The Fibrinogen collagen binding T-antigen (FCT) region, which is classified into 9 different  
370 types (FCT1-9), encodes for pilin structural and biosynthesis proteins and adhesins that could  
371 be potential determinants of genetics basis for tissue tropism (34). Therefore, we investigated  
372 the diversity of the FCT regions in isolates across the two geographical settings. Eight different  
373 patterns were identified across the two sites, corresponding to FCT1-6 and FCT9, as well as a  
374 previously unidentified pattern found among the LIC isolates, which we termed FCT10; it was  
375 similar to FCT5, but with an additional fibronectin binding protein (Figure 6). FCT3 was found  
376 in the most *emm*-types in both LIC and HIC isolate collections, 9/23 (39%) and 20/46 (43%),  
377 respectively, although this represented only 23% of the HIC isolates compared to 41% of LIC  
378 isolates. FCT4 was also found in a high proportion of *emm* types, accounting for 7/23 (30%)  
379 and 11/46 (24%) *emm*-types, representing 28% and 30% of HIC and LIC isolates, respectively.  
380 Due to the prevalence of *emm108* and *emm1* in HIC, 33% of isolates were either FCT1 or  
381 FCT2, whereas only 6% of the LIC isolates were FCT1 and no LIC isolates were FCT2. There  
382 was only one example of isolates of the same *emm*-type with two different FCT-types, and that  
383 was within the two LIC *emm118* isolates. While one *emm118* (ST1205) isolate was estimated  
384 to be FCT4, the other (ST354) was estimated to be FCT10, alongside the two LIC *emm63*



385 isolates. The FCT regions in both *emm118* isolates however were estimated as they were not  
386 found within a single contiguous sequence.

387 We also compared the amino acid sequences of the FCT regulatory genes *rofA*, *nra* and *msmR*  
388 and identified a number of different of variations. For the majority, variations were common  
389 to all isolates within an *emm*-type and there were no obvious variations that may affect  
390 function. We found that 9/10 HIC *emm1* isolates carried three variations within RofA that  
391 characterised them as being part of the M1<sub>UK</sub> lineage associated with high *speA* expression  
392 (35). No other isolates were found to carry any of these three RofA variations.

### 393 **Prevalence of antimicrobial resistance genes**

394 Of the 107 Gambian assemblies, the *tetM* gene encoding for tetracycline resistance was  
395 identified in 79/107 (73.8%), and 37 of these (33.6% of the total population) also carried the  
396 *tetL* gene and one carried *tetK*. Furthermore, *dfrG* or *dfrK*, both encoding for trimethoprim  
397 resistance, were identified in 10/107 (9.3%) and 17/107 (15.9%) of isolates respectively. Only  
398 53/142 (37.3%) of the HIC isolates carried the *tetM* gene (Figure 1 and 3) and no other  
399 resistance genes were found except for *ermA* in 8/142 (6.5%) isolates and two *emm11* isolates  
400 carried *ermB*, *sat4A* and *aph3*.

### 401 **Vaccine antigen diversity**

402 Based on the number of isolates with *emm*-types present in the vaccine, the potential coverage  
403 of the 30-valent M protein vaccine in the LIC isolates was 24%, with only 11 vaccine-included  
404 *emm*-types (Supplementary Figure 6). On the other hand, the potential coverage of the HIC  
405 isolates was 61%, although only 14 were vaccine-included *emm*-types. This suggests limited  
406 potential for this vaccine for low-income settings such as The Gambia, although there may be  
407 potential for cross-protection as has been seen for some *emm*-types (4, 36).

408 Among other potential vaccine candidates, the genes *spy0651*, *spy0762*, *spy0942*, *pulA*, *oppA*,  
409 *shr*, *speB*, *adi*, *ropA(tf)*, *spyCEP*, *slo*, *spyAD*, *fbp54* and *scpA* were recently highlighted as  
410 conserved potential targets (37). All LIC and HIC isolates carried all 14 genes and BLASTp  
411 indicated that all genes were highly conserved in all isolates with less than 1% sequence  
412 divergence (>99% identity) from the corresponding genes in reference genome MGAS5005  
413 (*emm1*).

#### 414 **Discussion**

415 The overall global burden of *S. pyogenes* infection and associated post-infection sequelae,  
416 highlights the need for more research into treatment and prevention, with a particular focus on  
417 vaccine development. Maximal global impact of a preventative vaccine against *S. pyogenes*  
418 can only be achieved on the back of better understanding of the global diversity of the *S.*  
419 *pyogenes* population, but to date, large-scale genomic studies have been mainly focused on  
420 HIC isolates. The Gambia, West Africa is a LIC with a high burden of streptococcal skin  
421 infections (15). Studies on circulating *emm*-types in this region, and in other African countries,  
422 indicate a much higher level of diversity than that seen in HICs (6- 9) and this is reflected in  
423 the limited African genomic data (37). In this study, we aimed to contribute genomic data and  
424 provide molecular characterisation of *S. pyogenes* in The Gambia by whole genome sequencing  
425 isolates collected during a population-based study of skin infections in children aged 5 years  
426 and under. To act as a comparison isolate collection, we also genome sequenced isolates from  
427 Sheffield, UK to represent HIC isolates.

428 Consistent with other findings from LICs (9), we identified a high number of different *emm*-  
429 types in the LIC isolate collection from The Gambia compared to the HIC isolate collection  
430 from the UK, and no dominant type. In the HIC isolates, five *emm*-types (*emm108*, *emm89*,  
431 *emm12*, *emm1* and *emm4*) accounted for ~60% of the isolates. There was also limited overlap

432 across the two sites with only 7 shared *emm*-types; *emm4*, 28, 75, 77, 80, 81 and 89. However,  
433 it was clear that these *emm*-types represented a different genetic background between the two  
434 locations, supporting previous findings that *emm* might not be a good marker for characterising  
435 a diverse global population (37).

436 Although we did not specifically select for impetigo isolates or patient age range amongst the  
437 HIC isolate collection, all were associated with some form of non-invasive skin infection. Little  
438 molecular information is available for *S. pyogenes* causing skin infections in the UK, as isolates  
439 are not routinely collected and typed, or for other HICs. The dominant *emm* genotypes found  
440 in the HIC isolates reflected what has been found in other types of infections, with *emm1*,  
441 *emm12* and *emm89* leading among invasive isolates in the UK (33) and *emm1*, *emm4*, *emm12*  
442 and *emm89* common among UK scarlet fever cases and upper respiratory tract infections (35,  
443 38). Very similar patterns of *emm*-types causing invasive disease are also found in other  
444 European countries and North America, with *emm1*, *emm28*, *emm89*, *emm3*, *emm12*, *emm4*  
445 and *emm6* leading (39). The genotype *emm108* has not previously been reported to be a  
446 common *emm*-type in the UK or elsewhere, but reported in 2018/2019 by Public Health  
447 England to be a cause of national upsurges in infections in England/Wales  
448 ([https://assets.publishing.service.gov.uk/government/uploads/system/uploads/attachment\\_data/file/800932/hpr1619\\_gas-sf3.pdf](https://assets.publishing.service.gov.uk/government/uploads/system/uploads/attachment_data/file/800932/hpr1619_gas-sf3.pdf)). The data on prevalence of this *emm*-type is based on  
449 invasive disease data, as only invasive infections are notifiable in England/Wales. From the  
450 available data it is not clear if it would have been common among throat infections during this  
451 time as well as skin infections, but suggests it is not unique to our sampled geographical region  
452 of Sheffield, UK.

454 The *emm*-pattern D, previously determined to be associated with skin infections, was the most  
455 common in the LIC isolates (48%) and the HIC isolates (36%), although *emm*-pattern E was

456 almost equally as common in HIC isolates (35%). A review of population-based studies (11)  
457 found that among impetigo isolates, 49.8% were D, 42% were E and 8.2% were A-C patterns,  
458 compared to 1.7% D, 51.7% E and 46.6% A-C patterns among pharyngeal isolates. This  
459 distribution is consistent with our findings in the LIC isolates (48% D, 40% E, 12% A-C) but  
460 we found a higher level of A-C isolates (29%) in HIC isolates. This could be due to the more  
461 diverse collection of HIC isolates, given that we did not focus specifically on impetigo.  
462 Interestingly, the dominant HIC *emm*-types were either pharyngeal specialist pattern A-C  
463 (*emm1* and *emm12*) or generalist pattern E (*emm4* and *emm89*), with only *emm108* representing  
464 skin specialist pattern D.

465 In the LIC isolates, all six E *emm*-clusters were represented, with the most common being E6  
466 (18%) closely followed by E4 (16%) and E3 (14%). E6 was recently found to be the leading  
467 cluster in Gambian non-invasive isolates (skin and pharyngeal) but with E3 leading among  
468 invasive isolates (9). D4 was also common in LIC isolates (17%) but, more so in HIC isolates  
469 where 35% of the isolates were D4. This was almost equal to all E clusters combined, but again  
470 explained by the high number of *emm108* isolates. A higher number of singleton *emm*-cluster  
471 types were also found in the LIC isolates (n=17) representing 9 *emm*-types, compared to HIC  
472 isolates (n=11) representing just two *emm*-types. There was an association with E *emm*-cluster  
473 isolates also carrying the *sof* gene, as all E1-E4 *emm*-types were *sof* positive. Four LIC E6  
474 *emm*-types (*emm46*, 65, 182 and 205) were *sof* negative and all E5 *emm*-types were negative.  
475 HIC *emm12* isolates carried a *sof* gene that would only produce a truncated form of SOF, as  
476 previously identified (11).

477 Consistent with the high number of D/E pattern isolates, we also found the majority of isolates  
478 had the Mga-regulon pattern I, and therefore carried the *emm*-like genes *mrp* and *enn*. Within  
479 the HIC *emm4* isolates we found that 4/9 carried the *emm-enn* fusion gene, and this was also

480 associated with degraded prophages in these isolates (40, 41). Given the high number of  
481 isolates carrying Mrp and Enn it is possible that they contribute to pathogenesis at the same, or  
482 even greater, level of the M protein (28). The M-like proteins have not been well characterised  
483 and their role and expression may vary depending on the allele or other genetic factors. The  
484 existence of two major clades within the Mrp and Enn phylogeny is of interest and may indicate  
485 varying domains and functions. Despite being adjacent to the *emm* gene, we did not observe  
486 sharing of *enn* and *mrp* alleles with *emm*-type over the two geographical sites. We did,  
487 however, see the same allele or very closely related alleles of *mrp* and *enn* shared with different  
488 *emm*-types across different geographical locations.

489 HIC *emm4* and *emm89* isolates were acapsular, as expected, but this was not the case for LIC  
490 *emm4* and *emm89*, again reflecting very different genetic backgrounds. All LIC isolates carried  
491 the *hasABC* genes required to synthesise the capsule, only one isolate had a mutation that would  
492 lead to a truncated HasA and a probably acapsular phenotype.

493 The FCT region encodes for genes thought to be involved in adhesion to the host, particularly  
494 the pili, which are likely to mediate primary host:pathogen interactions (42). Factors essential  
495 for pili construction are encoded within the FCT and include a major pilus subunit, one or two  
496 minor subunits, at least one specific sortase and a chaperone (42). The pili of the M1 isolate,  
497 SF370, has been shown to be essential for adherence to human tonsil and human skin (43),  
498 indicating its role in primary interactions and establishing infection. Other factors included  
499 within the FCT region are fibrinogen and fibronectin binding proteins, which may also  
500 contribute to host cell interactions, as well as transcriptional regulators. We identified the  
501 previously described FCT types FCT1-6 and FCT9 among our isolates but, also a new FCT  
502 type (FCT10) that was based on FCT5 with an additional fibronectin binding protein. FCT2  
503 and FCT6 was restricted to HIC isolates and the new FCT10 was only found in LIC isolates.

504 FCT3 and FCT4 were the most common types across both sites, found in 70% (16/23) and 74%  
505 (34/46) of *emm*-types, representing 54% (76/142) and 69% (74/107) HIC and LIC isolates,  
506 respectively. FCT3 and FCT4 have been shown to share the greatest similarity and can undergo  
507 recombination (42). Both these FCTs have a *cpa* gene, which encodes for a collagen binding  
508 subunit found at the pilus tip, one or two fibronectin-binding proteins (*sfbI/sfbII*) and the  
509 regulator *msmR* upstream of the fibronectin-binding protein. The pilus and fibronectin-binding  
510 proteins may contribute to tissue-specific host cell adhesion, in addition to others located  
511 outside the FCT region. This includes *fbaA*, which we identified to present in all isolates except  
512 for the majority of A-C pattern types, and has been found to contribute to skin infection (31).  
513 The regulator *msmR* has been shown to have a positive effect on the fibronectin binding protein  
514 expression and may also control other surface proteins, impacting on host cell adhesion (44).  
515 It is not clear if specific FCT types confer tissue tropism and previous work has shown that  
516 there is a high level of variability in host cell interactions and biofilm formation between  
517 isolates sharing the same FCT (45). This indicates that there are other bacterial factors involved  
518 in the expression of FCT related genes. The role of the regulators *nra* or *rofA* do vary between  
519 isolates of differing genetic backgrounds, with evidence of environmental effects such as pH  
520 and temperature (42). We explored the sequences of *rofA*, *nra* and *msmR* and found a number  
521 of different variations, however, many seemed to be related to *emm*-type and it is difficult to  
522 determine if any variation would impact on function. This was also the case for the two-  
523 component regulator CovR/S and the regulator of *cov*, RocA, for which variations can impact  
524 on the expression of a number of virulence factors. Variations in CovS and RocA were common  
525 among both LIC and HIC isolates but the transcriptional impact of any of these amino acid  
526 changes is unclear. Only one HIC isolate had an amino acid difference in CovR (M17I, *emm77*)  
527 and one other HIC isolate had a premature stop codon in CovS; both may alter expression of  
528 virulence genes. Whether there are differences in expression and control of FCT and other

529 virulence factor genes in LIC isolates compared to HIC isolates and/or between skin infection  
530 isolates and other types of infection isolates is yet to be determined. Inclusion of isolates  
531 causing other infections, such as pharyngeal infection isolates may reveal some tissue tropism  
532 differences or factors. However, the complex nature of regulatory systems also makes it  
533 difficult to determine the impact of single amino acid variants and control of transcription may  
534 vary between *emm*-types.

535 Superantigens are important *S. pyogenes* virulence factors and their distribution may differ  
536 between isolates. The chromosomal *speG* and *smeZ* genes were the most common in both  
537 populations, with more than 90% of the isolates carrying these genes. The prophage-associated  
538 *speC* and *ssa* were more common in HIC isolates compared to LIC isolates, and three HIC  
539 isolates actually carried two copies of *speC*, along with the DNase *spd1*, on two separate  
540 prophages. Typically, *speA* is prophage associated but the divergent *speA.4* allele is associated  
541 with a prophage-like element that has been previously only found in in *emm6*, *emm32*, *emm67*  
542 and *emm77* (32). We found this only in the HIC *emm6*, but, although *speA* was almost equally  
543 as common in the LIC population, all, except one, of the 22 *speA*-positive LIC isolates carried  
544 *speA.4* associated with the prophage-like element. Only a LIC *emm89* isolate carried *speA* on  
545 what appeared to be a complete prophage and was only one base pair different from the *speA.1*  
546 allele. Interestingly, we also identified a gene in one LIC isolate (*emm65*) that appeared to be  
547 a fusion of 5' *speK* and 3' *speM*, and since *speK* and *speM* are phage encoded, it could be a  
548 result of recombination of phages carrying the two genes. BLASTp of this potential fusion  
549 protein identified a similar (two-three amino acid different) variant in six published genomes;  
550 NS88.3 (*emm98*, locus accession PWO34032), *emm89.14* (QCK42181), *emm100*  
551 (QCK70992), NS426 (VGQ95836), NS76 (VGR28970) and NS6221 (VHG25078).



552 Only two of the prophage-associated DNases (*spd1* and *spd3*) were found in the LIC isolates,  
553 while five DNases (*sda1*, *sda2*, *sdn*, *spd1*, *spd3* and *spd4*) were identified in the HIC isolates.  
554 Almost all (136/142, 96%) of the HIC population carried at least one prophage-associated  
555 DNase, whereas only two LIC isolates carried *spd3* and only 24% of isolates carried *spd1*,  
556 which associated with the superantigen *speC*. DNases, such as *sda1*, have been shown to be  
557 necessary and sufficient to degrade neutrophil extracellular traps (46), therefore the lack of  
558 these in LIC isolates from The Gambia could be suggestive of limited/reduced ability of  
559 immune evasion, and warrants further investigation into their invasive capacity. There is the  
560 potential that other prophage-associated DNases exist but are yet to be identified. It also  
561 suggests differences in circulating phages between the two sites, although the accessory  
562 genome appeared to be much greater in LIC isolates compared to HIC isolates. This could be  
563 related to the high prevalence of tetracycline resistance genes within the LIC population that  
564 may be carried on mobile genetic elements. Further investigation is needed to determine  
565 prophage content, as well as other mobile genetic elements; this is, however, notoriously  
566 difficult with short read sequence data and may require supporting long read data.

567 The most advanced multi-valent *S. pyogenes* experimental vaccine is based on 30 *emm*-types  
568 identified from isolates causing infection predominantly in high income countries (4, 5). Based  
569 on the *emm*-types distributions, we determine the direct coverage of the vaccine to be only 24%  
570 in the LIC population, compared to 61% in the HIC population, although we did not explore  
571 cross-reactivity between *emm*-types. The high proportion of *emm108* in HIC isolates was  
572 unexpected as this was not a previously recognised dominant *emm*-type and highlights the  
573 potential for sudden and dramatic increases in new *emm*-types that could escape a serotype-  
574 specific vaccine. If such a vaccine was introduced, monitoring of new variants in the non-  
575 invasive as well as the invasive bacterial populations would be needed, and on a global scale.  
576 Alternatively, a vaccine targeting antigens with limited variability between isolates may be



577 preferable, if these can still provide similar levels of protection. We have confirmed that several  
578 previously identified potential targets (37) are also highly conserved in our LIC and HIC  
579 bacterial populations. However, both our LIC and HIC isolates represent only single  
580 geographical locations: Sukuta, The Gambia and Sheffield, UK. Further in-depth genomic  
581 analysis of international *S. pyogenes* populations, encompassing more LICs and different  
582 infection types, is needed to confirm diversity and distribution of potential vaccine diversity.

583 Our study confirms work by others (37), that *emm*-typing alone is insufficient to  
584 comprehensively characterise global isolates. Furthermore, genetic features that have been  
585 characterised in particular HIC *emm*-types, such as the absence of the *hasABC* locus in *emm4*,  
586 may not be present in LIC isolates of the same genotype. In the absence of WGS, other  
587 molecular markers, such as MLST, *enn*, *mrp* and FCT type could be used in addition to *emm*-  
588 typing to characterise the diverse genetic background of isolates from different geographical  
589 settings. More work is required to understand why there is such a high genetic diversity in LIC  
590 settings compared to HIC and with limited overlap. This may be linked to infection types but  
591 there is insufficient data both on pharyngeal infections in LICs, like The Gambia, as well as  
592 skin infections in HICs. By increasing the characterisation of isolates from different infections  
593 over wider geographical settings we could gain real insight into the molecular mechanisms  
594 underpinning tissue tropism.

## 595 **Contributors**

596 E.P.A, M.M and T.I.d.S coordinated collection of the Gambian isolates; L.T coordinated  
597 collection of the UK isolates; S.Y.B, A.J.K, E.S, S.D, L.T and H.K cultured bacterial isolates  
598 and extracted genomic DNA; J.M and A.K.S performed the whole genome sequencing of the  
599 Gambian isolates; S.Y.B and C.E.T performed the whole genome sequencing analyses with

600 assistance from R.R.C.; S.Y.B, C.E.T and T.I.d.S secured funding for the project; S.Y.B and  
601 C.E.T wrote the manuscript. All authors reviewed and edited the manuscript.

## 602 **Competing interests**

603 The authors declare that there are no competing interests.

## 604 **Acknowledgements**

605 We would like to thank the invaluable contribution of the members of the MRCG Strep A  
606 Study Group whose names are not in the main authorship list: Annette Erhart; Pierre R  
607 Smeesters; Martin Antonio; Sona Jabang; Beate Kampmann; Anna Roca; Isatou Jagne Cox;  
608 Peggy-Estelle Tiencheu; Grant Mackenzie.

609 This work is supported by Global Challenge Research Fund obtained through the University  
610 of Sheffield (S.Y.B). The authors also thank the MRCG at LSHTM and study participants.

611 C.E.T is a Royal Society & Wellcome Trust Sir Henry Dale Fellow (208765/Z/17/Z). T.I.d.S  
612 is supported by a Wellcome Trust Intermediate Clinical Fellowship (110058/Z/15/Z). E.P.A is  
613 supported by a Wellcome Trust Clinical PhD fellowship in Global Health (222927/Z/21/Z).

614 The authors thank Prof Pierre Smeesters and Dr Anne Botteaux (Universite Libre de Bruxelles)  
615 for kindly providing us with new allele numbers for *enn* and *mrp*.

## 616 **References:**

- 617 1. Walker MJ, Barnett TC, McArthur JD, Cole JN, Gillen CM, Henningham A,  
618 Sriprakash KS, Sanderson-Smith ML, Nizet V. (2014). Disease manifestations and  
619 pathogenic mechanisms of group A *Streptococcus*. Clin Microbiol Rev 27:264–301.
- 620 2. Watkins DA, Johnson CO, Colquhoun SM, Karthikeyan G, Beaton A, Bukhman G,  
621 Forouzanfar MH, Longenecker CT, Mayosi BM, Mensah GA, Nascimento BR,  
622 Ribeiro ALP, Sable CA, Steer AC, Naghavi M, Mokdad AH, Murray CJL, Vos T,  
623 Carapetis JR, Roth GA. (2017) Global, regional, & national burden of rheumatic heart

- 624 disease, 1990-2015. *N Engl J Med.* 377:713-722.
- 625 3. Vekemans J, Gouvea-Reis F, Kim JH, Excler JL, Smeesters PR, O'Brien KL, Van  
626 Beneden CA, Steer AC, Carapetis JR, Kaslow DC. (2019) The Path to Group A  
627 *Streptococcus* Vaccines: World Health Organization Research and Development  
628 Technology Roadmap and Preferred Product Characteristics. *Clin Infect Dis.* 69:877-  
629 883.
- 630 4. Dale JB, Penfound TA, Chiang EY, Walton WJ. (2011) New 30-valent M protein-  
631 based vaccine evokes cross-opsonic antibodies against non-vaccine serotypes of group  
632 A streptococci. *Vaccine* 29. 46:8175-8178.
- 633 5. Pastural É, McNeil SA, MacKinnon-Cameron D, Ye L, Langley JM, Stewart R,  
634 Martin LH, Hurley GJ, Salehi S, Penfound TA, Halperin S, Dale JB. (2020) Safety and  
635 immunogenicity of a 30-valent M protein-based group a streptococcal vaccine in  
636 healthy adult volunteers: A randomized, controlled phase I study. *Vaccine* 38. 6:1384-  
637 192.
- 638 6. Steer AC, Law I, Matatolu L, Beall BW, Carapetis JR. (2009) Global *emm* type  
639 distribution of group A streptococci: systematic review and implications for vaccine  
640 development. *Lancet Infect Dis.* 9:611-616.
- 641 7. Seale AC, Davies MR, Anampiu K, Morpeth SC, Nyongesa S, Mwarumba S,  
642 Smeesters PR, Efstratiou A, Karugutu R, Mturi N, Williams TN, Scott JAG, Kariuki S,  
643 Dougan G, Berkley JA. (2016) Invasive group A *Streptococcus* infection among  
644 children, rural Kenya. *Emerg Infect Dis* 22:224–232.
- 645 8. Salie T, Engel K, Moloi A, Muhamed B, Dale JB, Engel ME. (2020) Systematic  
646 Review and meta-analysis of the prevalence of Group A Streptococcal *emm* clusters in  
647 Africa to inform vaccine development. *mSphere* 5:e00429-20.
- 648 9. Jabang S, Erhart A, Darboe S, Baldeh AK, Delforge V, Watson G, Foster-Nyarko E,

- 649           Salaudeen R, Lawal B, Mackenzie G, Botteaux A, Antonio M, Smeesters PR, Sesay  
650           AK, Bah SY, Turner CE, De Silva T, Kampmann B, Anderson S, Roca A, Cox JJ,  
651           Tiencheu PE, Armitage EP, Keeley A. (2021) Molecular epidemiology of group A  
652           *Streptococcus* infections in the Gambia. *Vaccines* 9:124.
- 653   10.    Bessen DE, Smeesters PR, Beall BW. (2018) Molecular Epidemiology, Ecology, and  
654           Evolution of Group A Streptococci. *Microbiol Spectr* 6.
- 655   11.    Bessen DE, McShan WM, Nguyen SV, Shetty A, Agrawal S, Tettelin H. (2015)  
656           Molecular epidemiology and genomics of group A Streptococcus. *Infect Genet Evol.*  
657           33:393-418
- 658   12.    Bessen DE, Carapetis JR, Beall B, Katz R, Hibble M, Currie BJ, Collingridge T, Izzo  
659           MW, Scaramuzzino DA, Sriprakash KS. (2000) Contrasting molecular epidemiology  
660           of group A streptococci causing tropical and nontropical infections of the skin and  
661           throat. *J Infect Dis* 182:1109-16.
- 662   13.    Carapetis JR, Steer AC, Mulholland EK, Weber M. (2005) The global burden of group  
663           A streptococcal diseases. *Lancet Infect Dis.* 5:685-94
- 664   14.    Bowen AC, Mahé A, Hay RJ, Andrews RM, Steer AC, Tong SY, Carapetis JR. (2015)  
665           The Global Epidemiology of Impetigo: A Systematic Review of the Population  
666           Prevalence of Impetigo and Pyoderma. *PLoS One.* 10:e0136789.
- 667   15.    Armitage EP, Senghore E, Darboe S, Barry M, Camara J, Bah S, Marks M, Cerami C,  
668           Roca A, Antonio M, Turner CE, de Silva TI. (2019) High burden and seasonal  
669           variation of paediatric scabies and pyoderma prevalence in the Gambia: A cross-  
670           sectional study. *PLoS Negl Trop Dis.* 13:e0007801.
- 671   16.    Pospiech A, Neumann B. (1995) A versatile quick-prep of genomic DNA from Gram-  
672           positive bacteria. *Trends Genet.* 11:217-8.
- 673   17.    Bolger AM, Lohse M, Usadel B. (2014) Trimmomatic: A flexible trimmer for Illumina

- 674 sequence data. *Bioinformatics* 30:2114-20.
- 675 18. Bankevich A, Nurk S, Antipov D, Gurevich AA, Dvorkin M, Kulikov AS, Lesin VM,  
676 Nikolenko SI, Pham S, Prjibelski AD, Pyshkin A V., Sirotkin A V., Vyahhi N, Tesler  
677 G, Alekseyev MA, Pevzner PA. (2012) SPAdes: A new genome assembly algorithm  
678 and its applications to single-cell sequencing. *J Comput Biol.* 19:455-477.
- 679 19. Gurevich A, Saveliev V, Vyahhi N, Tesler G. (2013) QUASt: Quality assessment tool  
680 for genome assemblies. *Bioinformatics.* 29:1072-5.
- 681 20. Seemann T. (2014) Prokka: Rapid prokaryotic genome annotation. *Bioinformatics.*  
682 30:2068-9.
- 683 21. Page AJ, Cummins CA, Hunt M, Wong VK, Reuter S, Holden MTG, Fookes M,  
684 Falush D, Keane JA, Parkhill J. (2015) Roary: Rapid large-scale prokaryote pan  
685 genome analysis. *Bioinformatics.* 31:3691-3.
- 686 22. Stamatakis A. (2014) RAxML version 8: a tool for phylogenetic analysis and post-  
687 analysis of large phylogenies. *Bioinformatics.* 30:1312–1313.
- 688 23. Letunic I, Bork P. (2019) Interactive Tree of Life (iTOL) v4: Recent updates and new  
689 developments. *Nucleic Acids Res.* 47:W256-W259.
- 690 24. Li H, Durbin R. (2009) Fast and accurate short read alignment with Burrows-Wheeler  
691 transform. *Bioinformatics.* 25:1754-60.
- 692 25. Gupta SK, Padmanabhan BR, Diene SM, Lopez-Rojas R, Kempf M, Landraud L,  
693 Rolain JM. (2014) ARG-ANNOT, a new bioinformatic tool to discover antibiotic  
694 resistance genes in bacterial genomes. *Antimicrob Agents Chemother.* 58:212-20.
- 695 26. Quinlan AR, Hall IM. (2010) BEDTools: A flexible suite of utilities for comparing  
696 genomic features. *Bioinformatics.* 26:841-2.
- 697 27. Assefa S, Keane TM, Otto TD, Newbold C, Berriman M. (2009) ABACAS: algorithm-  
698 based automatic contiguation of assembled sequences. *Bioinformatics.* 25:1968-9.

- 699 28. Frost HR, Davies MR, Delforge V, Lakhloufi D, Sanderson-Smith M, Srinivasan V,  
700 Steer AC, Walker MJ, Beall B, Botteaux A, Smeesters PR. (2020) Analysis of Global  
701 Collection of Group A *Streptococcus* Genomes Reveals that the Majority Encode a  
702 Trio of M and M-Like Proteins. *mSphere*. 5:e00806-19.
- 703 29. Falugi F, Zingaretti C, Pinto V, Mariani M, Amodeo L, Manetti AGO, Capo S, Musser  
704 JM, Orefici G, Margarit I, Telford JL, Grandi G, Mora M. (2008) Sequence Variation  
705 in Group A *Streptococcus* Pili and Association of Pilus Backbone Types with  
706 Lancefield T Serotypes . *J Infect Dis*. 198:1834-41.
- 707 30. Sanderson-Smith M, De Oliveira DMP, Guglielmini J, McMillan DJ, Vu T, Holien JK,  
708 Henningham A, Steer AC, Bessen DE, Dale JB, Curtis N, Beall BW, Walker MJ,  
709 Parker MW, Carapetis JR, Van Melder L, Sriprakash KS, Smeesters PR, Batzloff M,  
710 Towers R, Goossens H, Malhotra-Kumar S, Guilherme L, Torres R, Low D, McGeer  
711 A, Krizova P, El Tayeb S, Kado J, Van Der Linden M, Erdem G, Moses A, Nir-Paz R,  
712 Ikebe T, Watanabe H, Sow S, Tamboura B, Kittang B, Melo-Cristino J, Ramirez M,  
713 Straut M, Suvorov A, Totolian A, Engel M, Mayosi B, Whitelaw A, Darenberg J,  
714 Normark BH, Ni CC, Wu JJ, De Zoysa A, Efstratiou A, Shulman S, Tanz R. (2014) A  
715 systematic and functional classification of *Streptococcus pyogenes* that serves as a new  
716 tool for molecular typing and vaccine development. *J Infect Dis*. 210:1325-38.
- 717 31. Rouchon CN, Ly AT, Noto JP, Luo F, Lizano S, Bessen DE. (2017) Incremental  
718 Contributions of FbaA and Other Impetigo-Associated Surface Proteins to Fitness and  
719 Virulence of a Classical Group A *Streptococcal* Skin Strain. *Infect Immun*. 85:e00374-  
720 17.
- 721 32. Banks DJ, Porcella SF, Barbian KD, Beres SB, Philips LE, Voyich JM, DeLeo FR,  
722 Martin JM, Somerville GA, Musser JM. (2004) Progress toward characterization of the  
723 group A *Streptococcus* metagenome: Complete genome sequence of a macrolide-

- 724 resistant serotype M6 strain. *J Infect Dis.* 190:727-38.
- 725 33. Turner CE, Holden MTG, Blane B, Horner C, Peacock SJ, Sriskandan S. (2019) The  
726 emergence of successful *Streptococcus pyogenes* lineages through convergent  
727 pathways of capsule loss and recombination directing high toxin expression. *MBio.*  
728 10:e02521-19.
- 729 34. Kratovac Z, Manoharan A, Luo F, Lizano S, Bessen DE. (2007) Population genetics  
730 and linkage analysis of loci within the FCT region of *Streptococcus pyogenes*. *J*  
731 *Bacteriol.* 189:1299-310.
- 732 35. Lynskey NN, Jauneikaite E, Li HK, Zhi X, Turner CE, Mosavie M, Pearson M, Asai  
733 M, Lobkowicz L, Chow JY, Parkhill J, Lamagni T, Chalker VJ, Sriskandan S. (2019)  
734 Emergence of dominant toxigenic MIT1 *Streptococcus pyogenes* clone during  
735 increased scarlet fever activity in England: a population-based molecular  
736 epidemiological study. *Lancet Infect Dis.* 19:1209-1218.
- 737 36. Frost HR, Laho D, Sanderson-Smith ML, Licciardi P, Donath S, Curtis N, Kado J,  
738 Dale JB, Steer AC, Smeesters PR. 2017. Immune Cross-Opsonization within *emm*  
739 clusters following group A *Streptococcus* skin infection: Broadening the scope of type-  
740 specific immunity. *Clin Infect Dis.* 65:1523-1531.
- 741 37. Davies MR, McIntyre L, Mutreja A, Lacey JA, Lees JA, Towers RJ, Duchêne S,  
742 Smeesters PR, Frost HR, Price DJ, Holden MTG, David S, Giffard PM, Worthing KA,  
743 Seale AC, Berkley JA, Harris SR, Rivera-Hernandez T, Berking O, Cork AJ, Torres  
744 RSLA, Lithgow T, Strugnell RA, Bergmann R, Nitsche-Schmitz P, Chhatwal GS,  
745 Bentley SD, Fraser JD, Moreland NJ, Carapetis JR, Steer AC, Parkhill J, Saul A,  
746 Williamson DA, Currie BJ, Tong SYC, Dougan G, Walker MJ. (2019) Atlas of group  
747 A streptococcal vaccine candidates compiled using large-scale comparative genomics.  
748 *Nat Genet.* 51:1035–1043.



- 749 38. Chalker V, Jironkin A, Coelho J, Al-Shahib A, Platt S, Kapatai G, Daniel R, Dhami C,  
750 Laranjeira M, Chambers T, Guy R, Lamagni T, Harrison T, Chand M, Johnson AP,  
751 Underwood A, Ramsay M, Fry N, Purohit A, Brown R. (2017) Genome analysis  
752 following a national increase in Scarlet Fever in England 2014. *BMC Genomics*.  
753 18:224.
- 754 39. Gherardi G, Vitali LA, Creti R. (2018) Prevalent *emm*-types among invasive GAS in  
755 Europe and North America since year 2000. *Front Public Health*. 6:59.
- 756 40. DebRoy S, Li X, Kalia A, Galloway-Pena J, Shah BJ, Fowler VG, Flores AR,  
757 Shelburne SA. (2018) Identification of a chimeric *emm* gene and novel *emm* pattern in  
758 currently circulating strains of *emm4* Group A *Streptococcus*. *Microb Genom*.  
759 4:e000235.
- 760 41. Remington A, Haywood S, Edgar J, Green LR, de Silva T, Turner CE. (2021)  
761 Cryptic prophages within a *Streptococcus pyogenes* genotype *emm4* lineage. *Microb*  
762 *Genom*. 7:mgen000482.
- 763 42. Nakata M, Kreikemeyer B. (2021) Genetics, Structure, and Function of Group A  
764 Streptococcal Pili. *Front Microbiol*. 12:616508.
- 765 43. Abbot EL, Smith WD, Siou GPS, Chiriboga C, Smith RJ, Wilson JA, Hirst BH, Kehoe  
766 MA. (2007) Pili mediate specific adhesion of *Streptococcus pyogenes* to human tonsil  
767 and skin. *Cell Microbiol*. 9:1822-33.
- 768 44. Nakata M, Podbielski A, Kreikemeyer B. (2005) MsmR, a specific positive regulator  
769 of the *Streptococcus pyogenes* FCT pathogenicity region and cytolysin-mediated  
770 translocation system genes. *Mol Microbiol*. 57:786-803.
- 771 45. Köller T, Manetti AGO, Kreikemeyer B, Lembke C, Margarit I, Grandi G, Podbielski  
772 A. (2010) Typing of the pilus-protein-encoding FCT region and biofilm formation as  
773 novel parameters in epidemiological investigations of *Streptococcus pyogenes* isolates



774 from various infection sites. J Med Microbiol. 59:442-452.

775 46. Buchanan JT, Simpson AJ, Aziz RK, Liu GY, Kristian SA, Kotb M, Feramisco J,  
776 Nizet V. (2006) DNase expression allows the pathogen group A *Streptococcus* to  
777 escape killing in neutrophil extracellular traps. Curr Biol. 16:396-400.

778

779 **Figures**

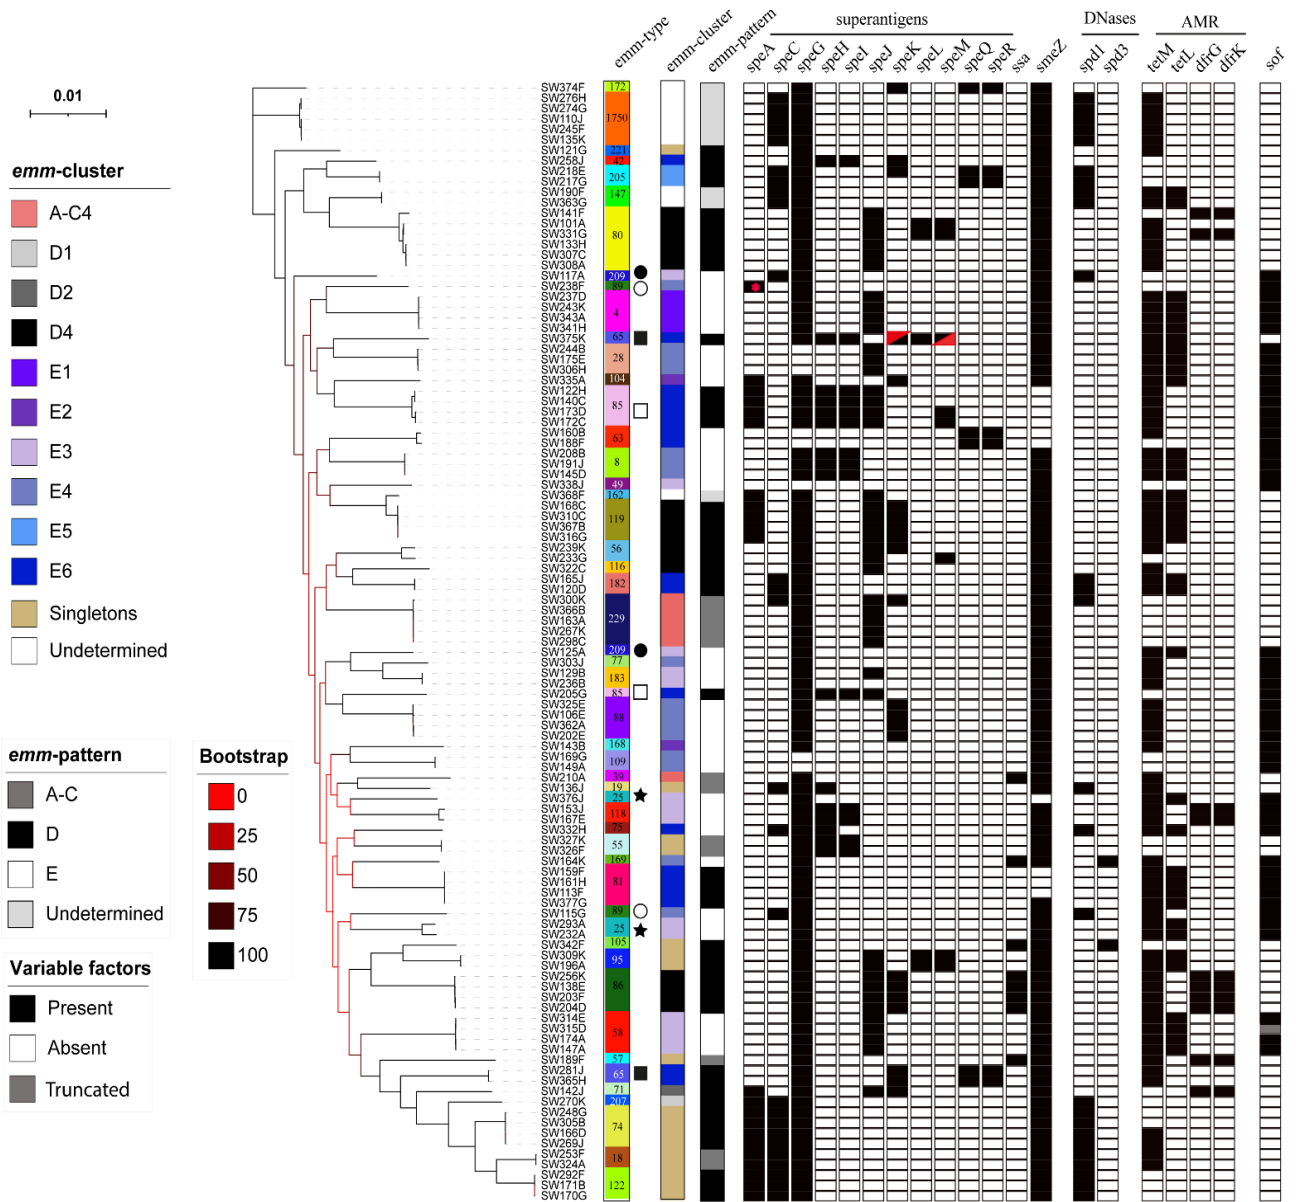

**Figure 1: Phylogenetic analysis of 107 genomes from LIC isolates.** A maximum likelihood phylogeny was constructed from the core-gene alignment (1,242,112bp) using RAxML (22) with 100 bootstraps. Isolates clustered by *emm*-type except those indicated, whereby two lineages were represented by a single *emm* genotype: star; *emm25*, filled square; *emm65*, open square; *emm85*, open circle; *emm89*, filled circle; *emm209*). Also shown is the presence (black)/absence (white) of the superantigen genes (*speA*, *speC*, *speG*, *speH-M*, *speQ*, *speR*, *ssa* and *smeZ*) and DNase genes *spd1* and *spd3*; four other DNase genes (*sdal*, *sda2*, *sdn*, and

*spd4*) were tested for but were not found in any isolate. In all cases, except one (red dot), *speA* was located within the prophage-like element  $\Phi$ 10394.2. One isolate had a gene that appeared to be a fusion of 5' *speK* and 3' *speM* (red triangles). Antimicrobial resistance genes (AMR) *tetM*, *tetL*, *dfrG* and *dfrK* were also identified in some isolates (white; absent, black; present). The positivity for serum opacity factor (*sof*) is also shown, although for one *emm55* isolate this gene would produce a truncated variant of SOF (grey). Scale bar represents substitutions per site. *emm*-types are coloured for easy visualisation and type numbers are also given.

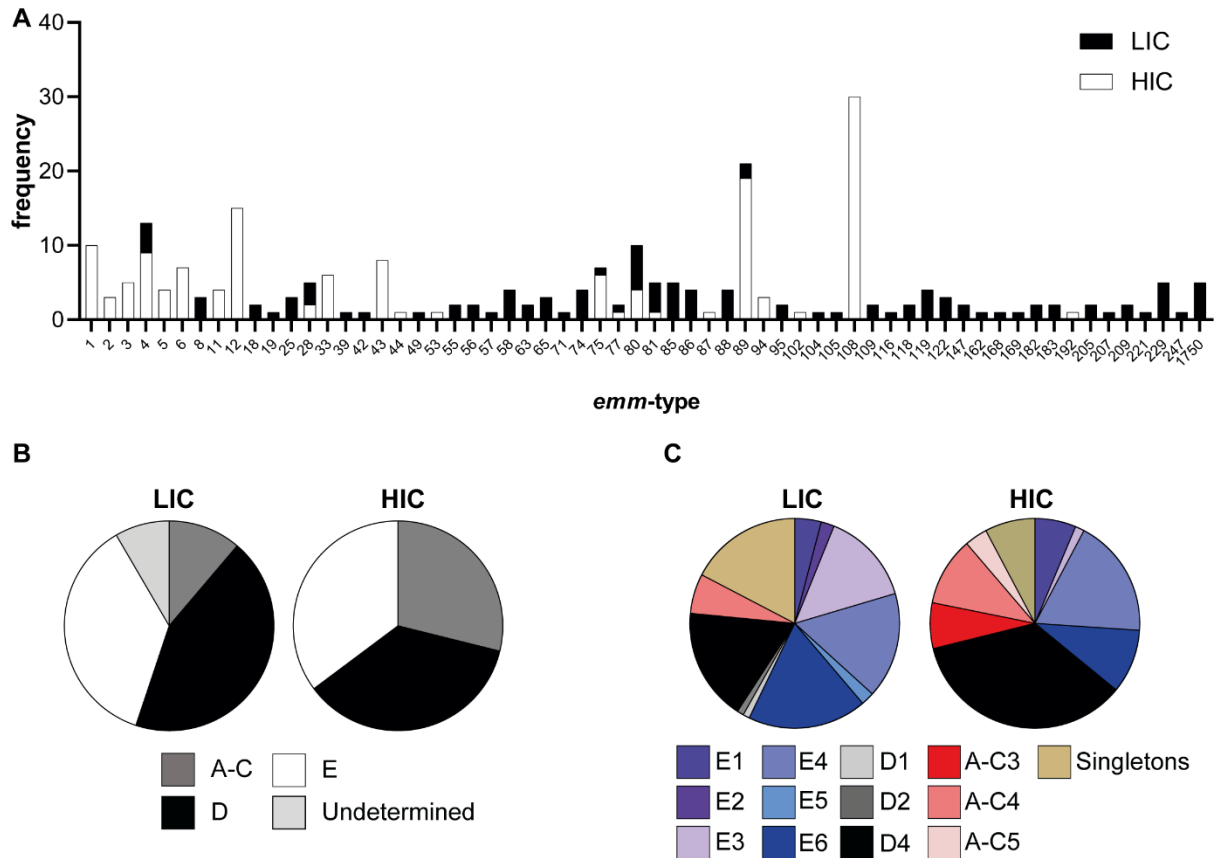

**Figure 2. Distribution of *emm*-type, pattern and cluster differs by site.** (A) The frequency of each of the 62 *emm*-types identified in the LIC isolates (Black) and the HIC isolates (White). (B) An *emm*-pattern of A-C, D or E was assigned to 98/107 LIC isolates (the remaining 9 were undetermined) and all 142 HIC isolates. (C) An *emm*-cluster was also assigned to 98/107 LIC isolates (the remaining 9 were excluded) and all 142 HIC isolates. Pie charts represent the percentage of isolates associated with each pattern/cluster.

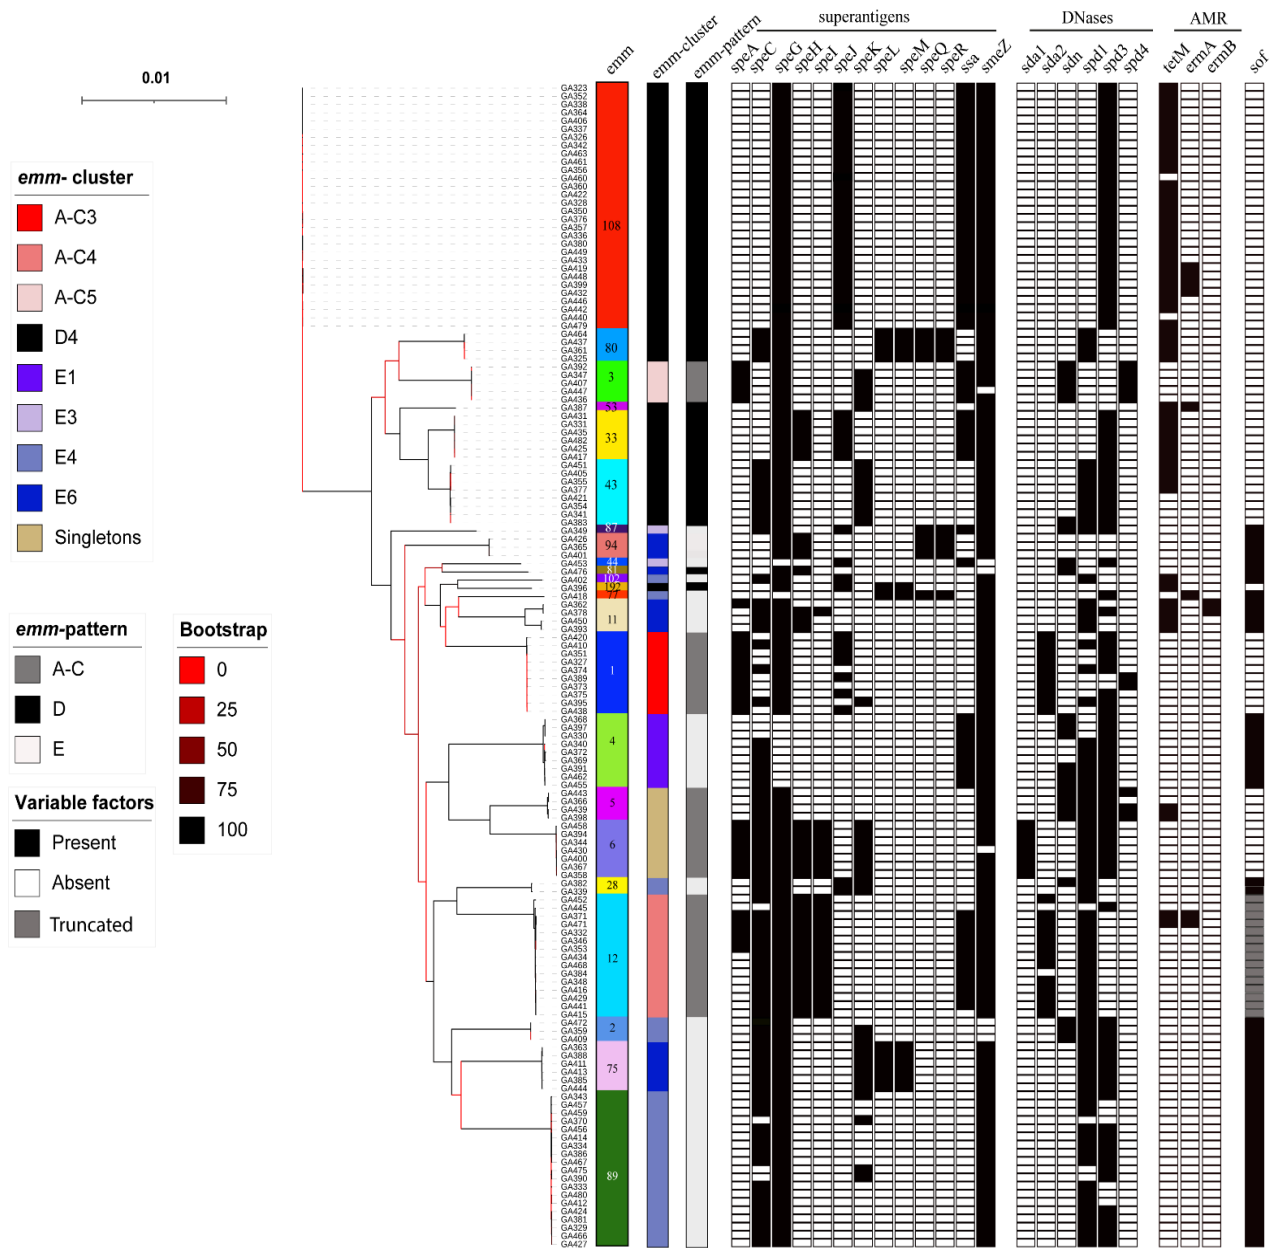

**Figure 3: Phylogenetic analysis of 142 HIC isolates:** A maximum likelihood phylogenetic tree was generated with the core-gene alignment (1,202,105bp) using RAxML (22) with 100 bootstraps. All isolates clustered by *emm*-type. Presence (black)/absence (white) of superantigens (*speA*, *speC*, *speG*, *speH-M*, *speQ*, *speR*, *ssa* and *smeZ*) and DNases (*sda1*, *sda2*, *sdn*, *spd1*, *spd3* and *spd4*) is indicated. Antimicrobial resistance genes (AMR) *tetM*, *ermA* and *ermB* were also identified in some isolates (white; absent, black; present). The positivity for serum opacity factor (*sof*) is also shown, but in all *emm12* this gene would produce a truncated variation of SOF (grey). Scale bar represents substitutions per site. *emm*-

types are coloured for easy visualisation and type numbers are also given.

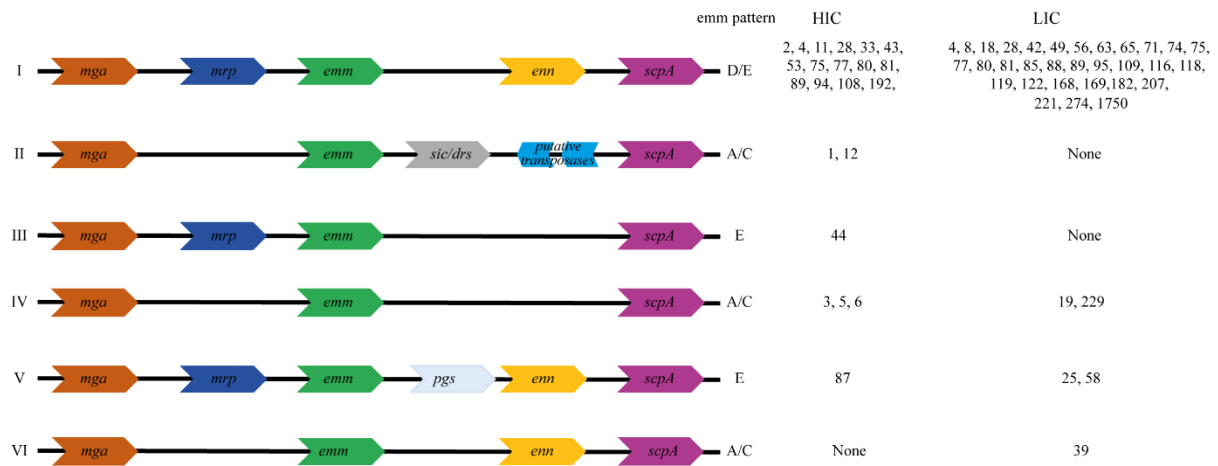

**Figure 4: Arrangement of genes in the Mga regulon.** The genes within the *mga* regulon for each isolate was determined and an Mga-regulon type I-VI assigned. The majority of *emm* types in both the HIC isolates and LIC isolates had type I with the M-like protein genes *mrp* and *enn* flanking the M protein gene *emm*. The previously assigned *emm* pattern A-C/D/E (based on the *emm* type) is also given. The streptococcal inhibitor of complement (*sic*) gene was only identified in HIC *emm1* isolates, and the distantly related to *sic* (*drs*) gene found only in HIC *emm12* isolates. The gene *pgs* encodes for Pgs, a 15.5kDa protein of unknown function (28).

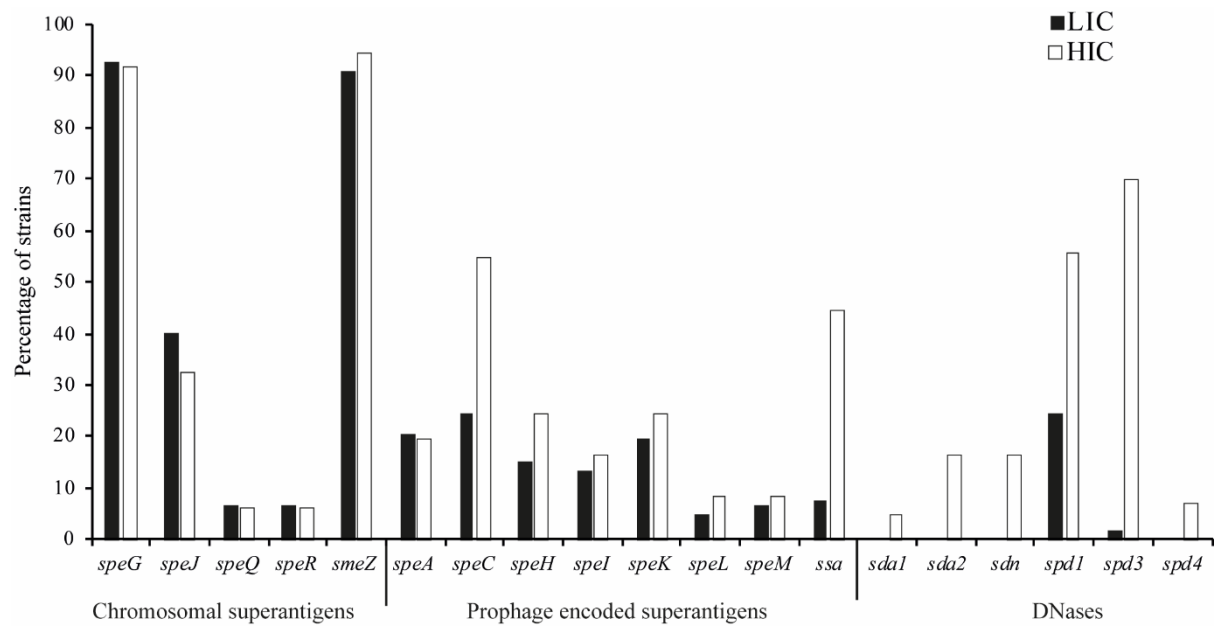

**Figure 5: Superantigen and DNase gene carriage in LIC isolates compared to HIC isolates.** The proportions of the LIC isolates (black bars) and HIC isolates (white bars) carrying the respective genes determined by BLAST analysis and mapping.



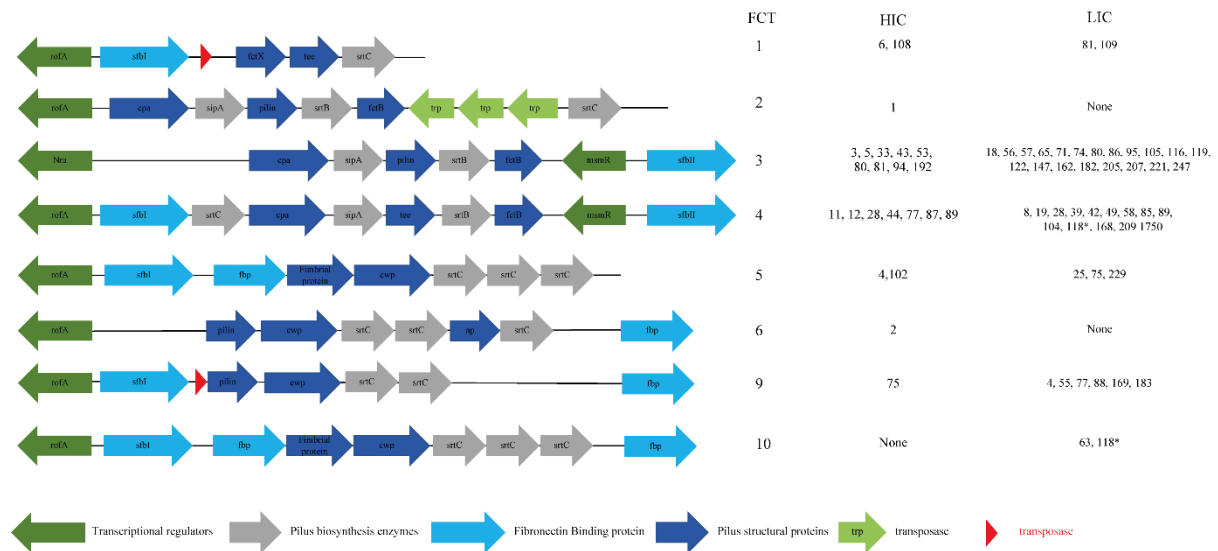

**Figure 6: FCT arrangement patterns identified in LIC and HIC *S. pyogenes* isolates.**

FCT regions were extracted from *de novo* assemblies and the FCT type assigned based on the predicted function and order of genes within the extracted region. The *emm*-types of isolates with each FCT type are shown for HIC and LIC isolates. A new FCT region was identified (FCT10) as similar to FCT5 but with an additional fibronectin binding protein after the sortase genes. For all *emm*-types there was at least one isolate with a designated FCT type in a single contiguous region. The only exception to this was *emm118* (\*) where the FCT was estimated to be FCT4 and the new FCT10 for each of the two isolates as the FCT region was split over two contigs. In FCT1 transposases were found in HIC *emm6* and *emm108*, and in FCT9, transposases were found in HIC *emm75* and LIC *emm4*. fbp; fibronectin binding protein, cwp; cell wall protein, ap; ancillary protein and trp; transposase.

## Supplementary Figures

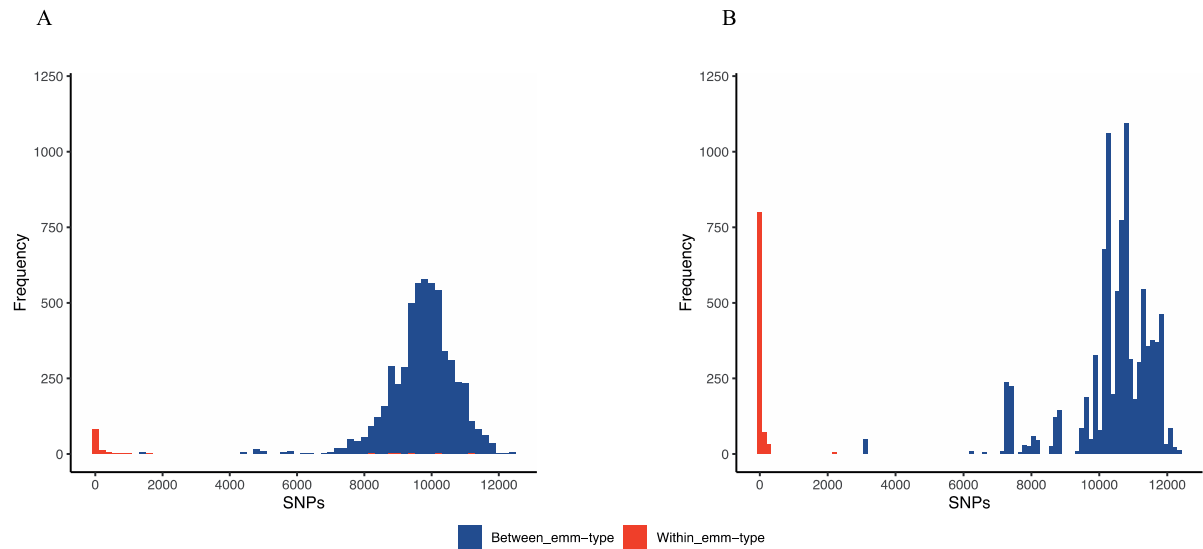

### Supplementary Figure 1: Pairwise single nucleotide polymorphisms (SNPs) distances

SNPs were determined from the core-genome of (A) 107 LIC isolates and (B) 142 HIC isolates and pairwise distance calculated between isolates belonging to the same (red) or different (blue) *emm*-type. Overall, the median pairwise SNP distance within the same *emm*-type of LIC isolates was 22 (range 0-11,142 SNPs), similar to that of HIC isolates with a median of 17 (range 0-2,206). Also comparable was the between *emm*-type median SNP distance; 9,816 (range 1,423-12,428) for LIC isolates, 11,110 (range 3,057-12,339) for HIC isolates.

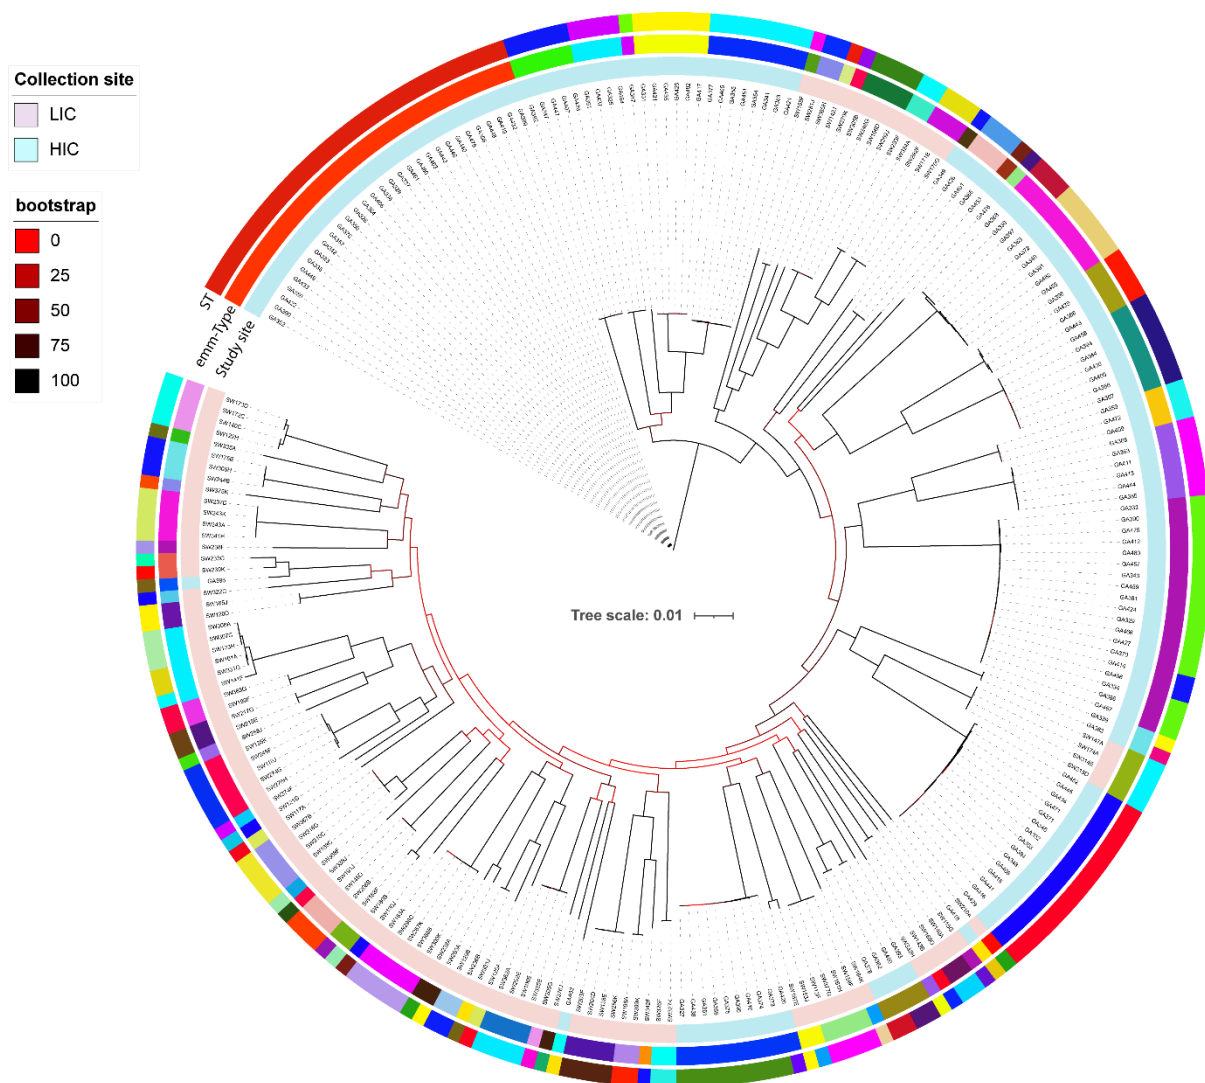

**Supplementary Figure 2: Population structure of the combined LIC (107) and HIC (142) isolates.** A maximum likelihood phylogenetic was generated from the core-gene alignment (1,146,086bp) using RAxML with 100 bootstraps. Bootstrap support is indicated by colours in the legend. Inner circle: site of collection, middle circle: *emm*-types and outer circle: ST.

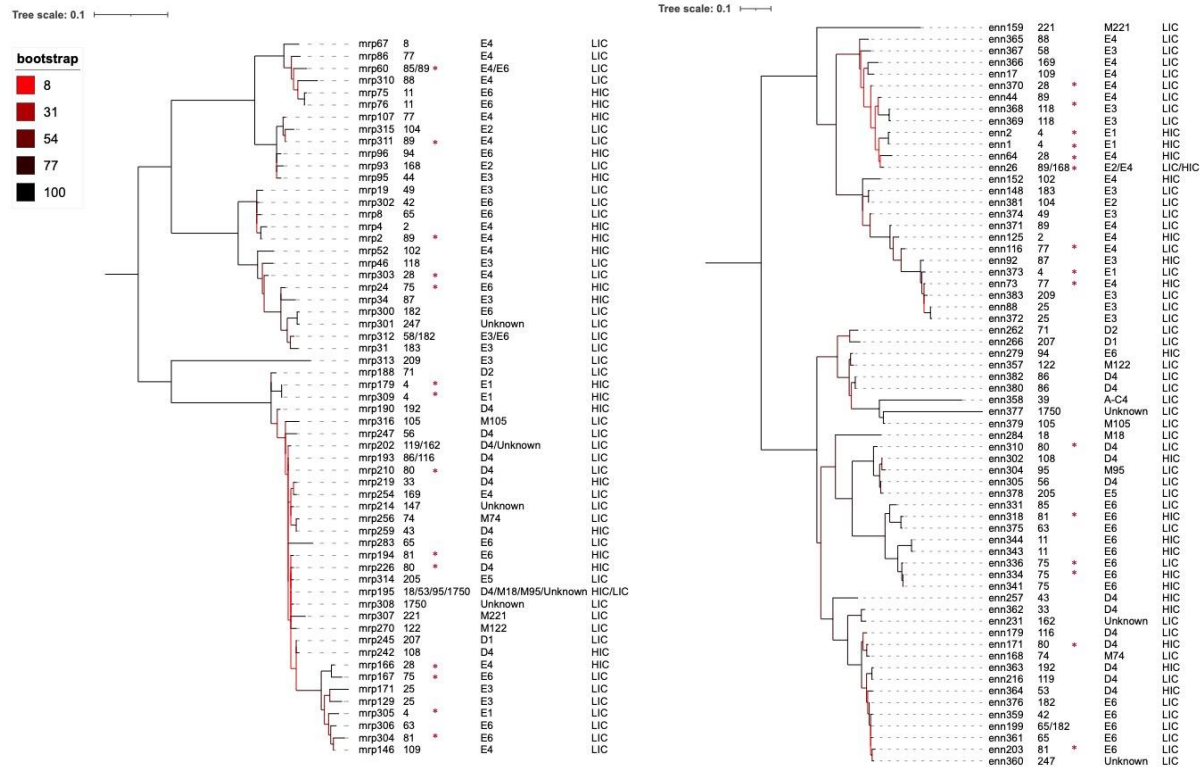

**Supplementary Figure 3: Phylogenetic relatedness of unique Mrp (A) Enn (B) alleles.** A maximum likelihood phylogenetic tree was generated from an amino acid alignment of unique Mrp or Enn alleles, using RAxML with 100 bootstraps (branch support shown by colour scale). The Mrp or Enn allele is shown followed by the associated *emm*-type(s), *emm* cluster(s) and population (LIC or HIC). \* indicates the shared *emm*-types identified in both sites.

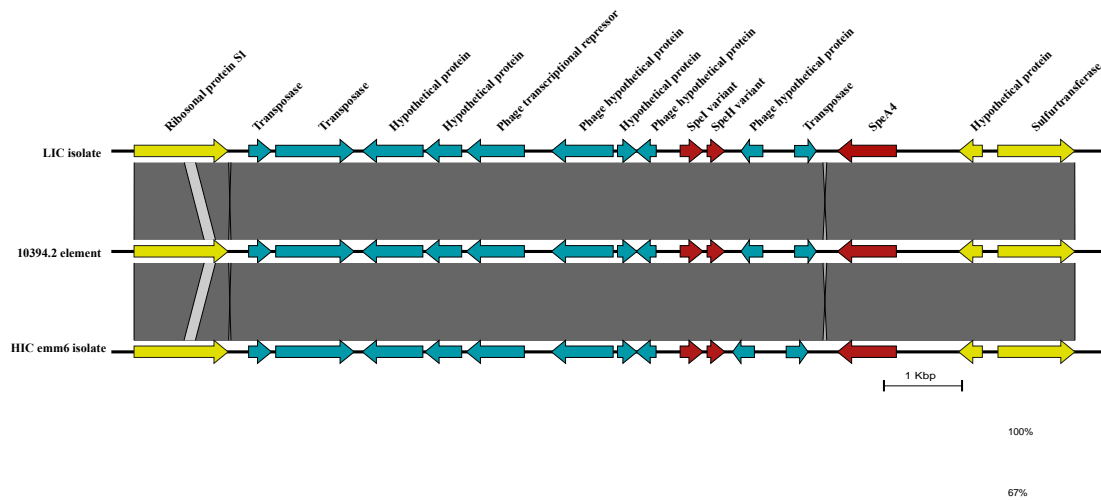

**Supplementary Figure 4: Comparison of 10394.2 phage-like element with the region found in HIC *emm6* isolates and LIC isolates.** The *speA4* in LIC isolates and HIC *emm6* were located within this phage-like element. This region also contains fragments of *speI* and *speH*. The same element was found in all LIC isolates that carried *speA*, except one that carried a different *speA* allele associated with a prophage. The corresponding regions were extracted from the respective isolate genomes and figure generated using EasyFig.

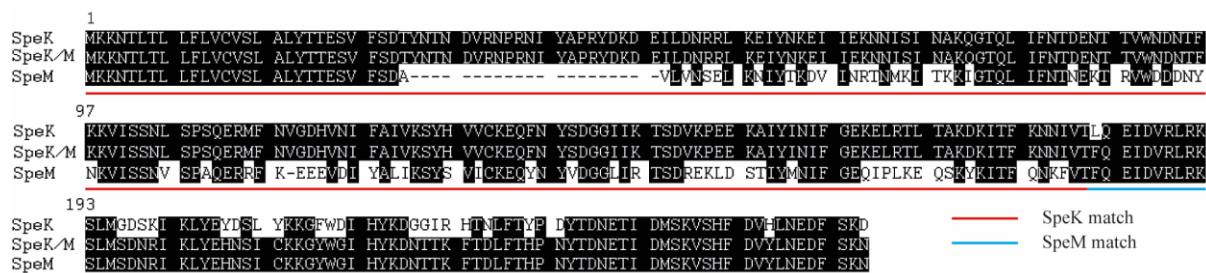

### Supplementary Figure 5: Alignment of the SpeK/SpeM fusion protein to SpeK and SpeM.

Within an *emm65* isolate from LIC, we identified a gene that encodes for 259 amino acids (aa) of which the first 180 aa were 100% identical to the first 180 aa of SpeK (red underlined) but the remaining 181-259 aa were 100% identical to the last 159-237 aa of SpeM (blue underlined). Black shading indicates identical aa.

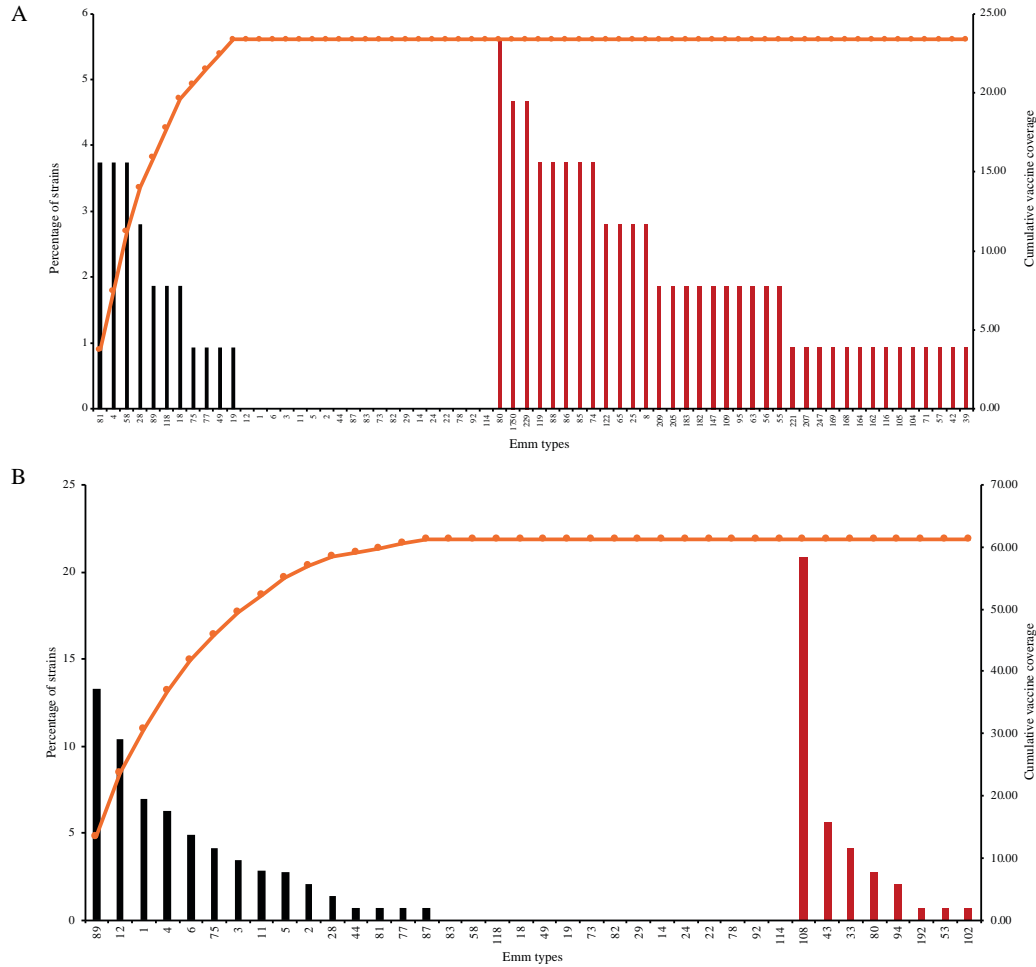

**Supplementary Figure 6: Potential coverage of the *S. pyogenes* 30-valent vaccine.** The percentage of (A) LIC and (B) HIC isolates of *emm*-types included in the 30-valent vaccine (black) and other *emm*-types identified in each site but not included in the vaccine (red). The cumulative vaccine coverage for each site is also shown. The *emm*-types without the bars are vaccine included *emm*-types but not seen in the dataset.
